# Supplementary material for: Peptides from chicken processing by-product inhibit DPP-IV and promote cellular glucose uptake: potential ingredients for T2D management
Source: Royal Society of Chemistry journal article supplement (doi:10.1039/c8fo02450b), 2019-01-01

*Supporting Information for:*

**Peptides from chicken processing by-product inhibit DPP-IV and promote cellular glucose uptake: potential ingredients for T2D management**

Rita de Cássia Lemos Lima,<sup>1</sup> Ragnhild Stenberg Berg,<sup>1</sup> Sissel Beate Rønning,<sup>1</sup> Nils Kristian Afseth,<sup>1</sup> Svein Halvor Knutsen,<sup>1</sup> Dan Staerk,<sup>2</sup> and Sileshi Gizachew Wubshet<sup>1\*</sup>

<sup>1</sup>*NOFIMA AS, Osloveien 1, Ås, Norway*

<sup>2</sup>*Department of Drug Design and Pharmacology, University of Copenhagen, Copenhagen, Denmark*

\*Corresponding author. Tel.: +47 909 17 126

*E-mail address:* sileshi.wubshet@nofima.no (Sileshi G. Wubshet).

**Figure S1.** Dose response curves of DPP-IV inhibition for the crude hydrolysate RC80 (A) and the corresponding SEC fraction F5 (B). Inserted below are  $IC_{50}$  values, 95% confidence interval (CI) and  $R^2$  value of the none-linear fit.

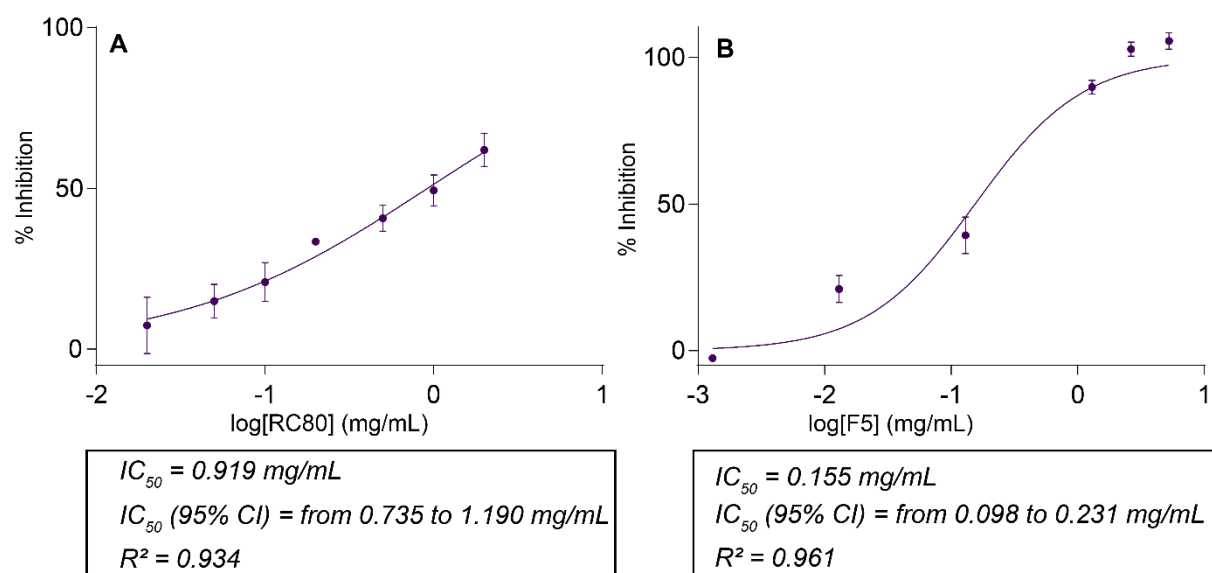

**Figure S2.** MS (top) and MS/MS (bottom) spectra of the peptide eluted as peak 1.

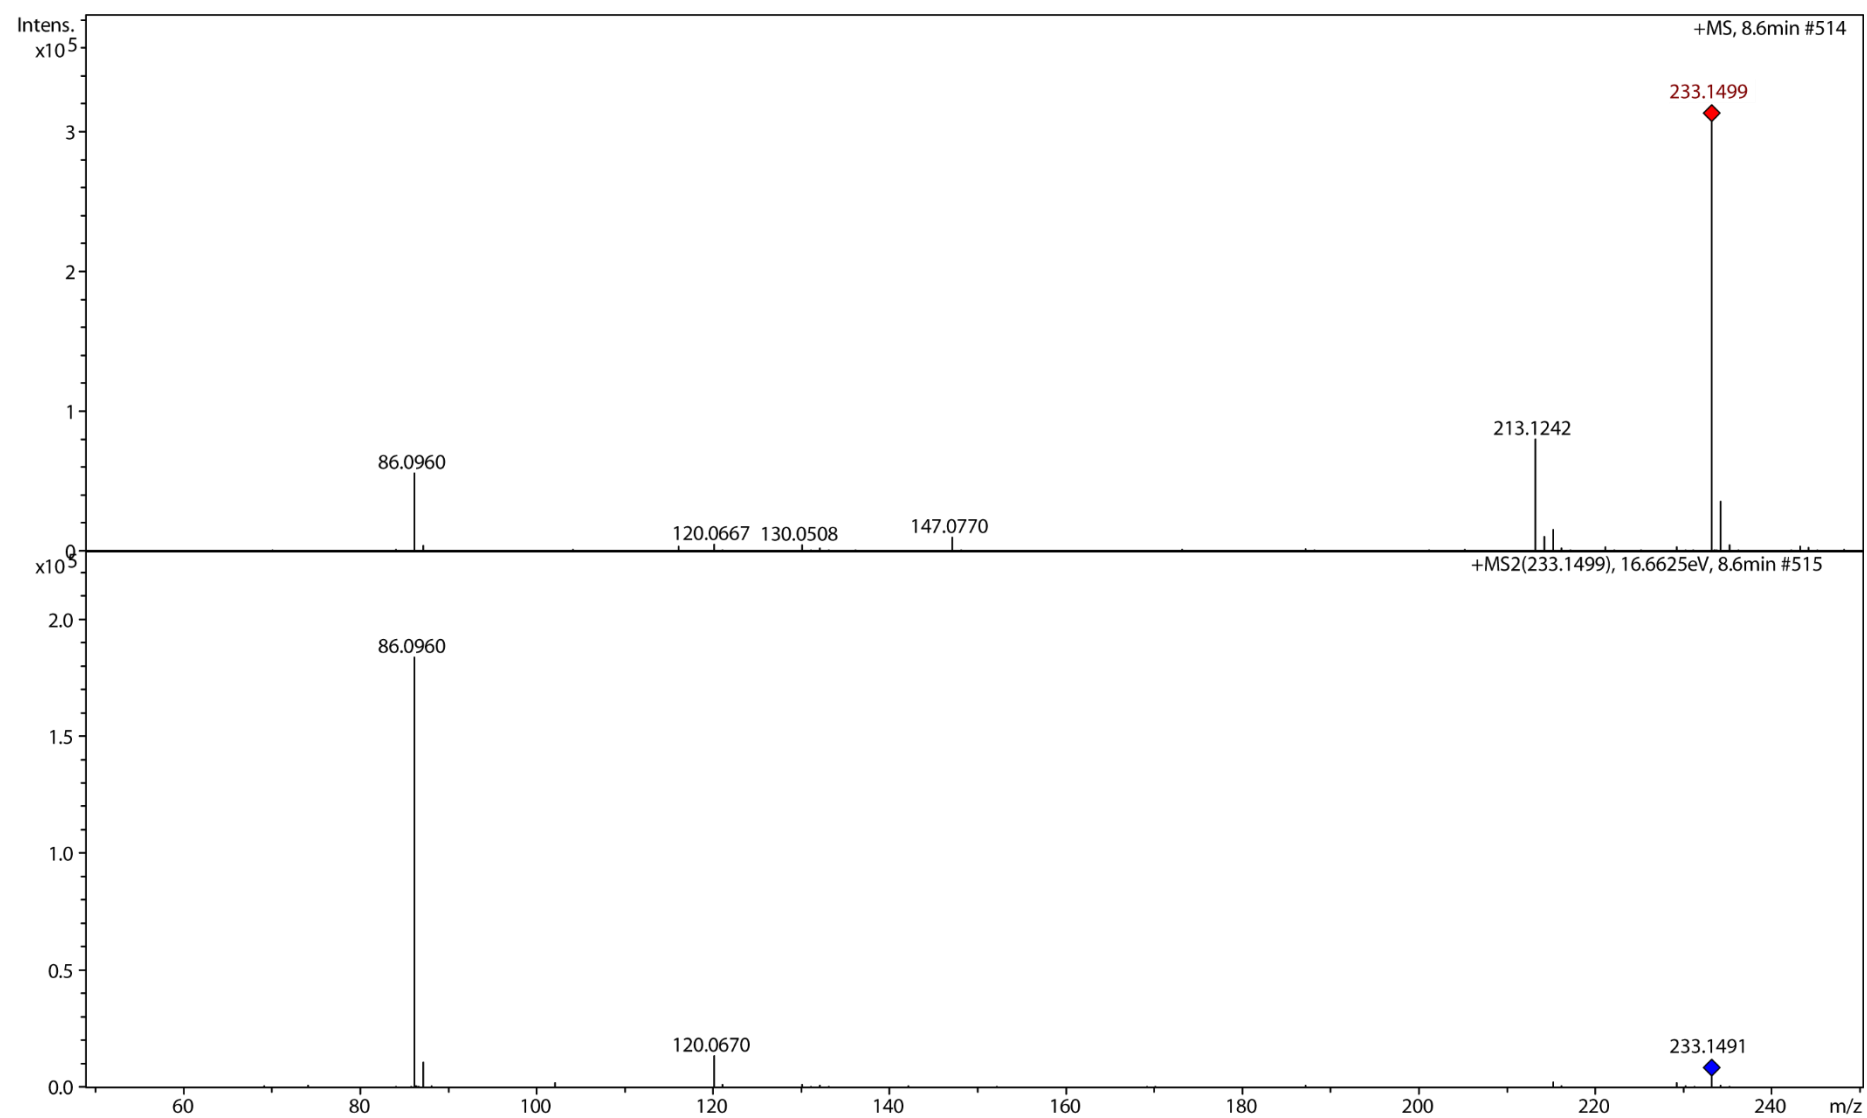

**Figure S3.** MS (top) and MS/MS (bottom) spectra of the peptide eluted as peak 2.

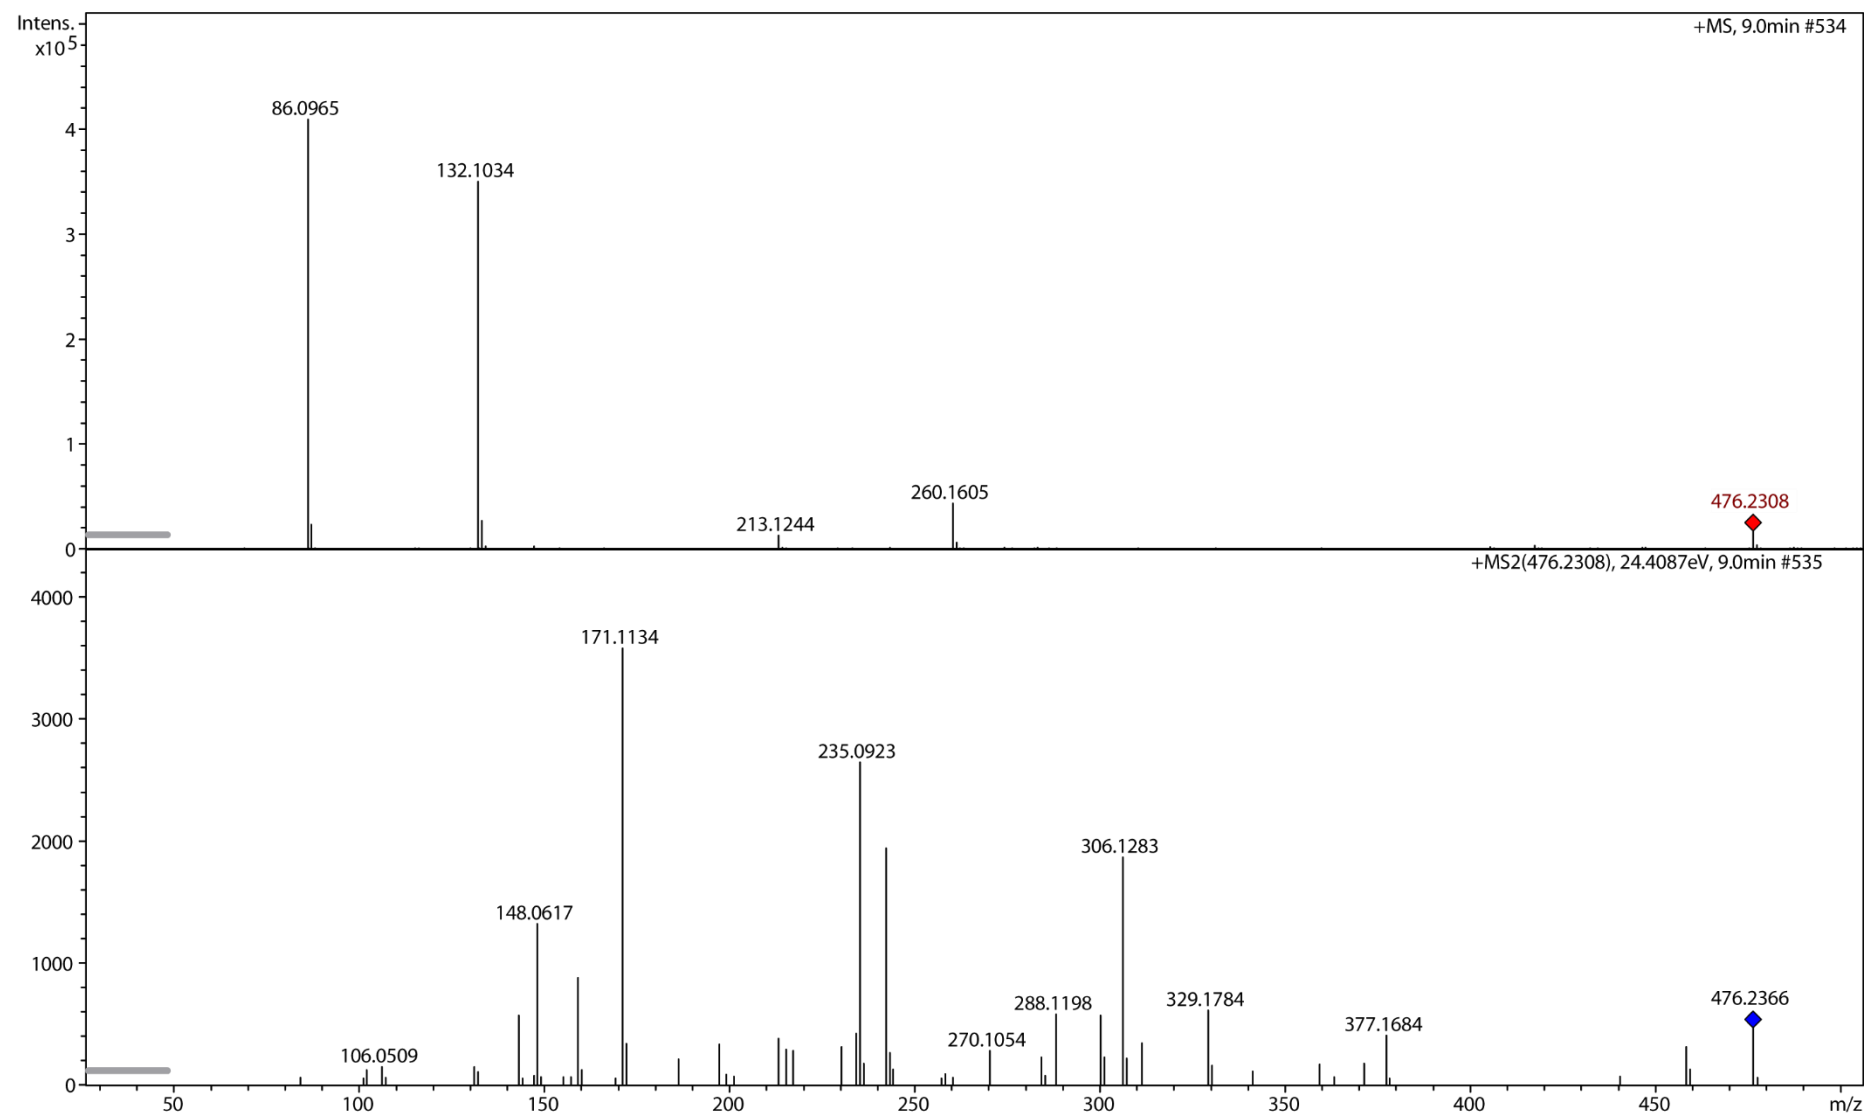

**Figure S4.** MS (top) and MS/MS (bottom) spectra of the peptide eluted as peak 3.

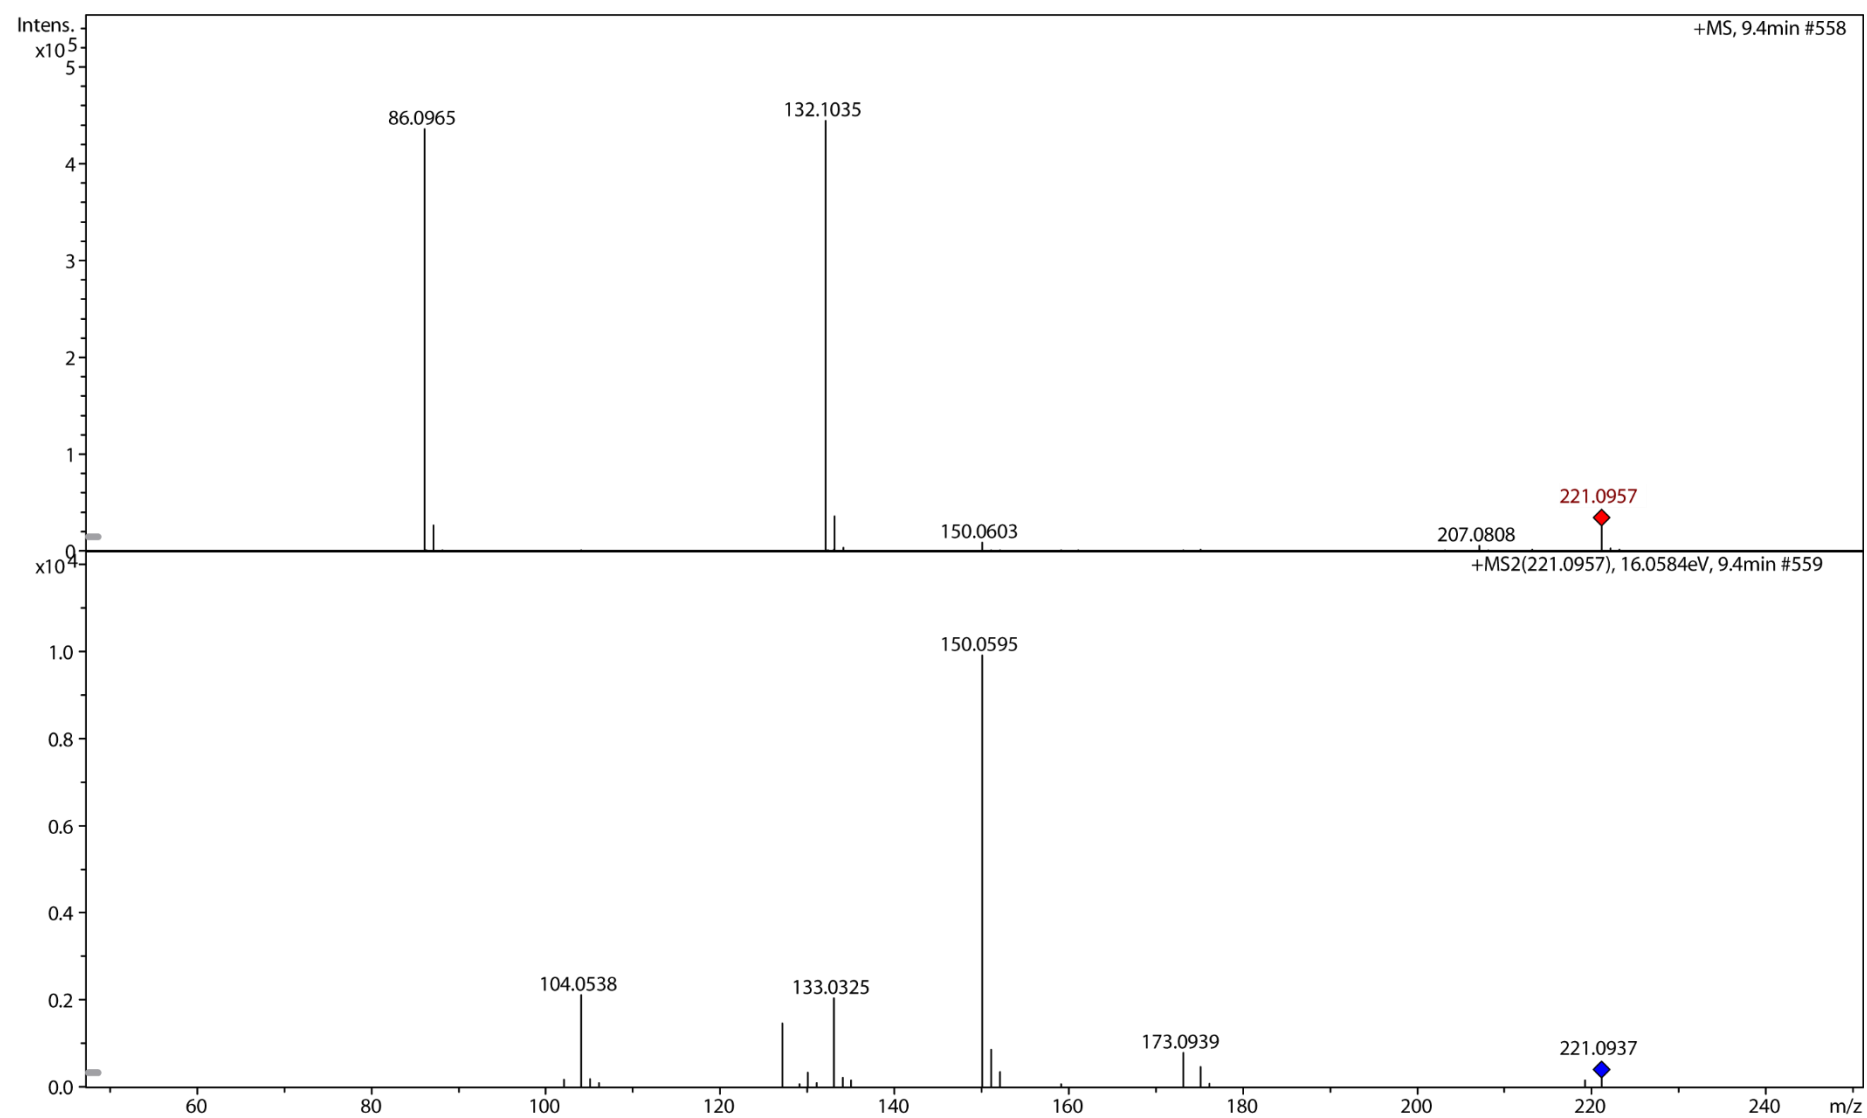

**Figure S5.** MS (top) and MS/MS (bottom) spectra of the peptide eluted as peak 4.

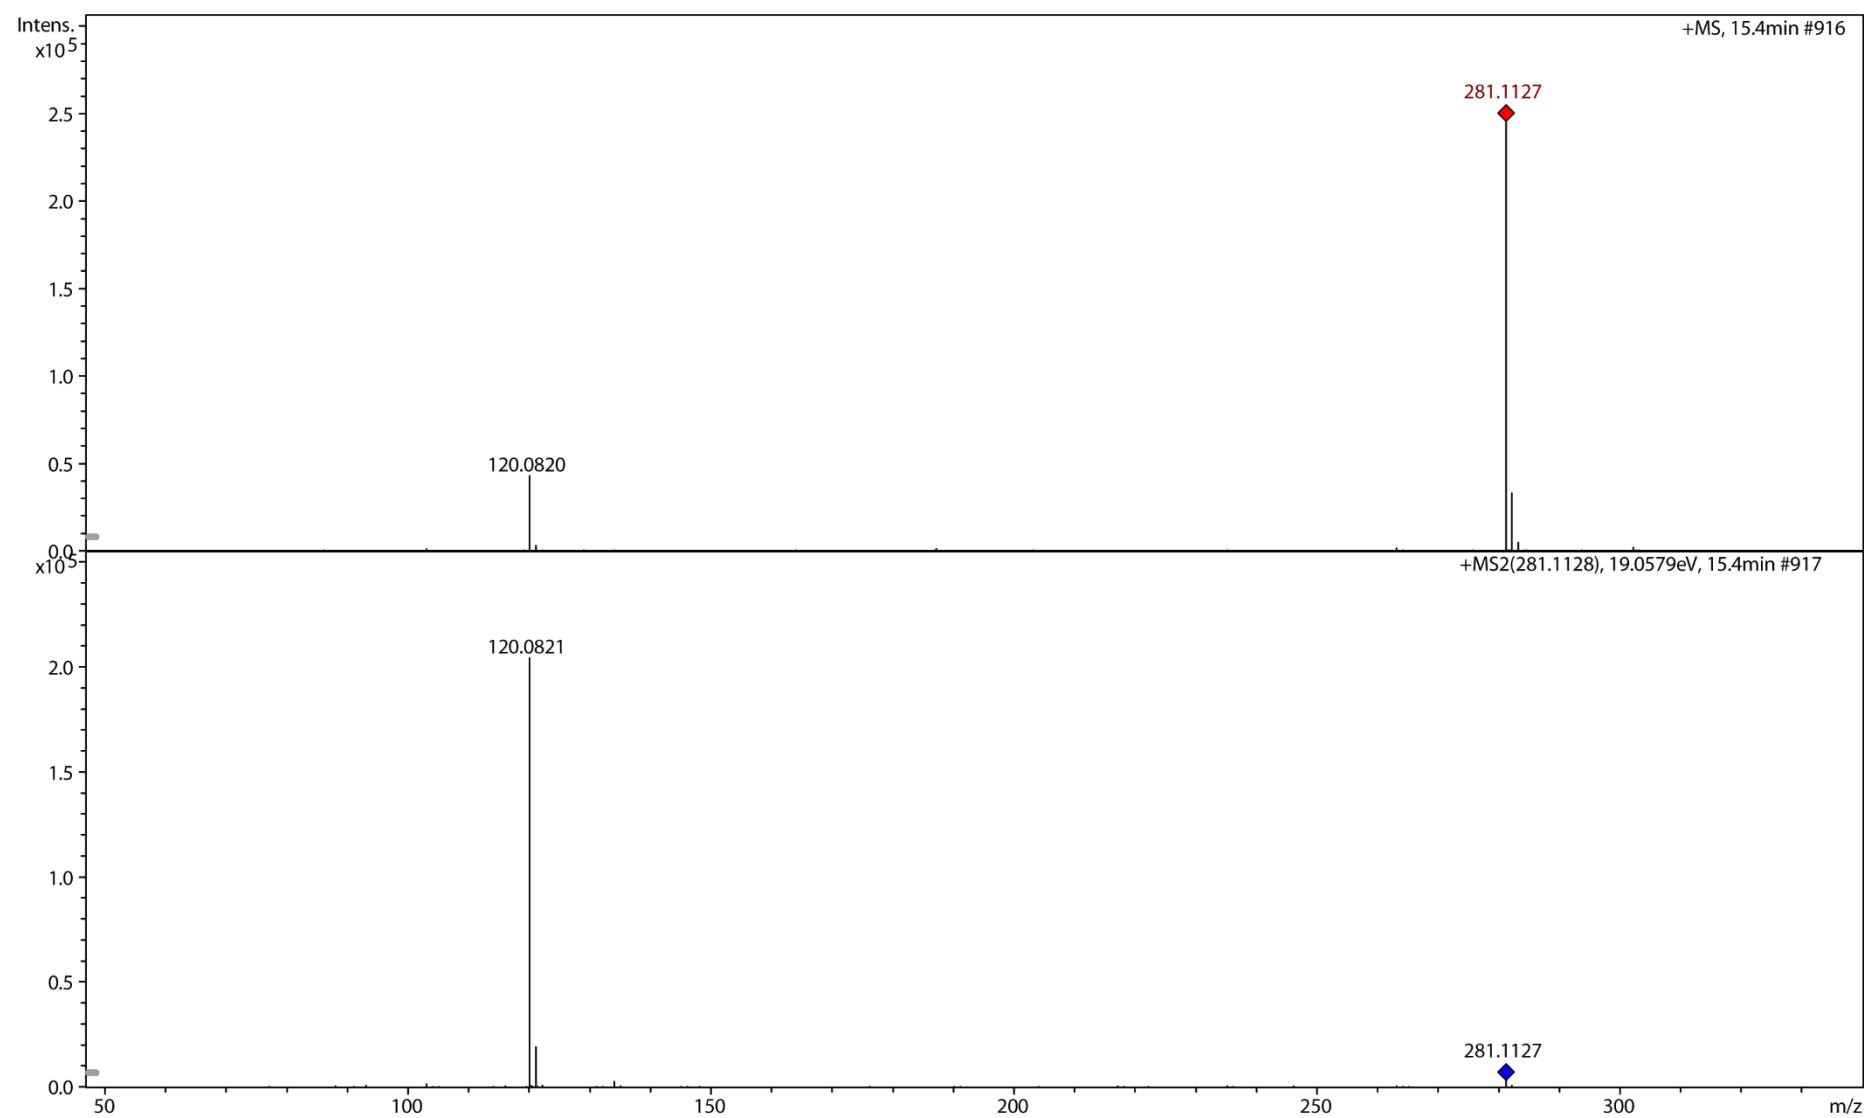

**Figure S6.** MS (top) and MS/MS (bottom) spectra of the peptide eluted as peak 5.

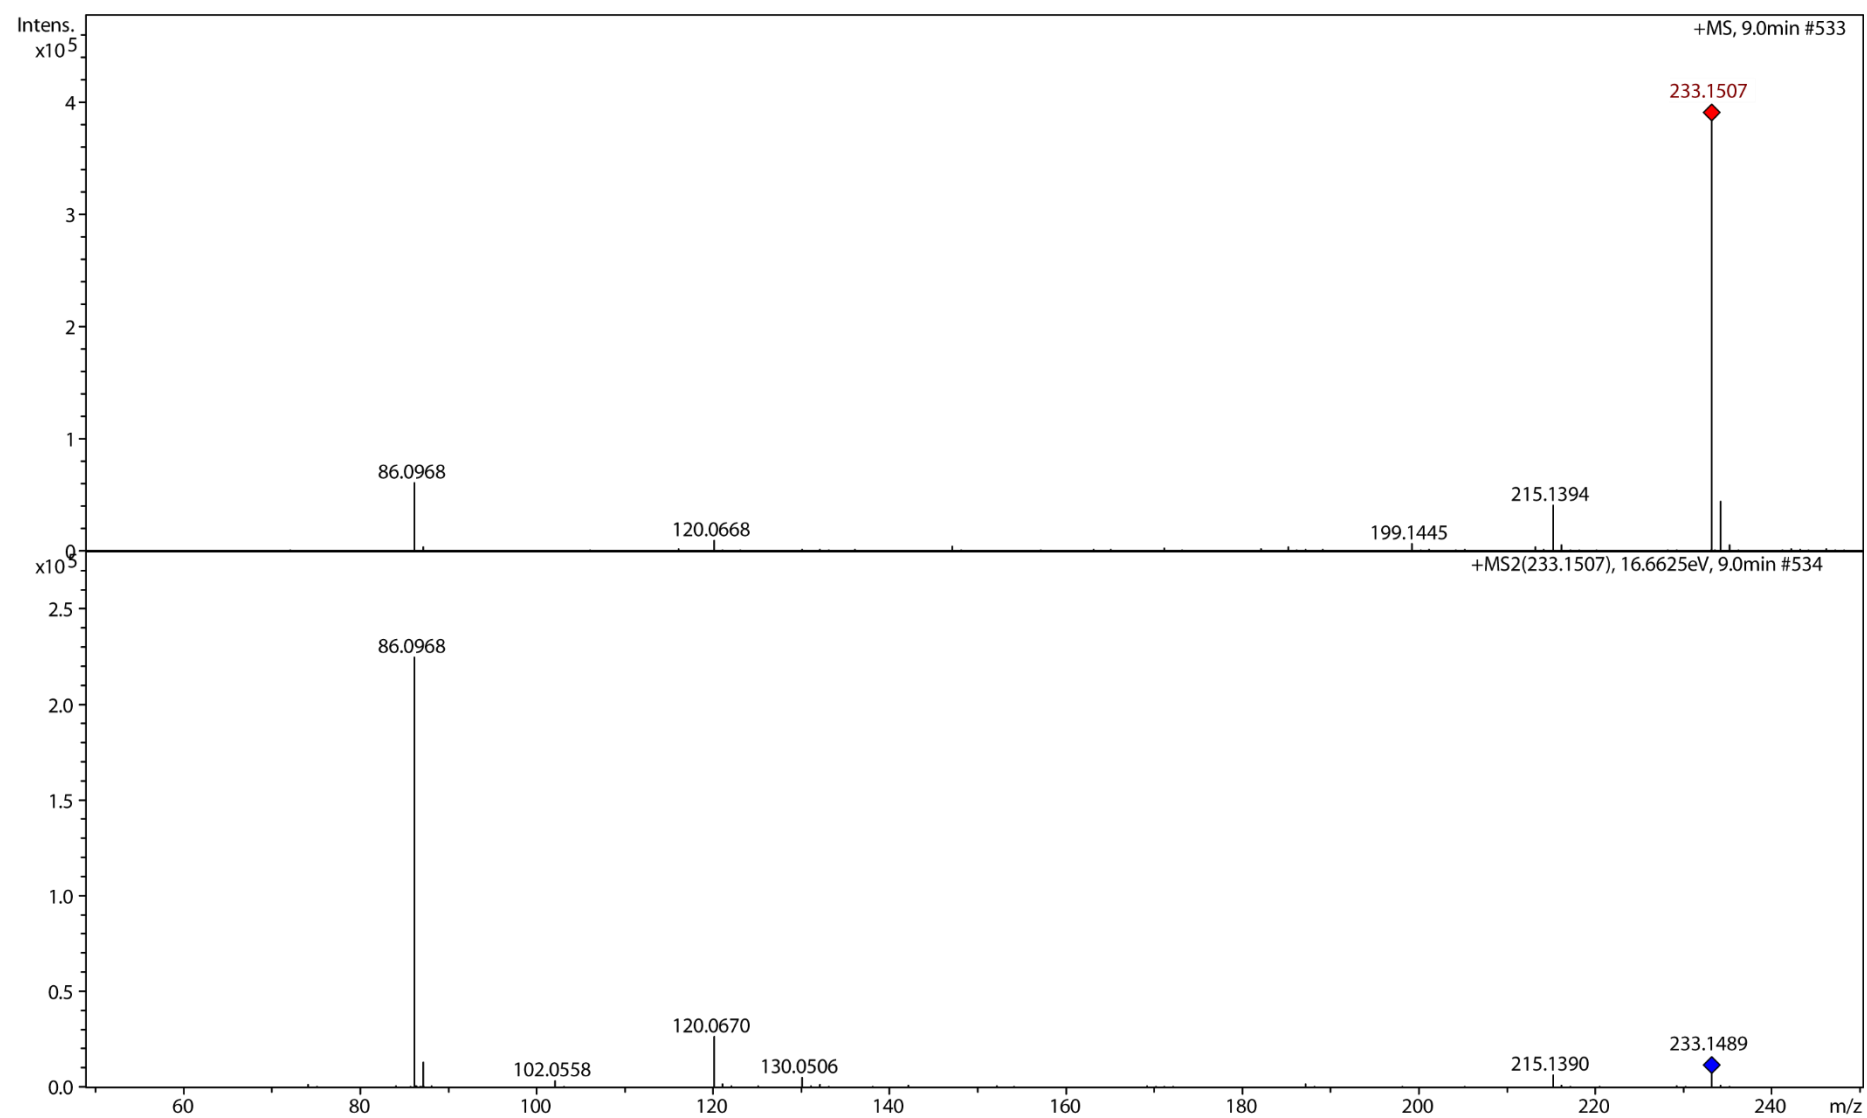

**Figure S7.** MS (top) and MS/MS (bottom) spectra of the peptide eluted as peak 6.

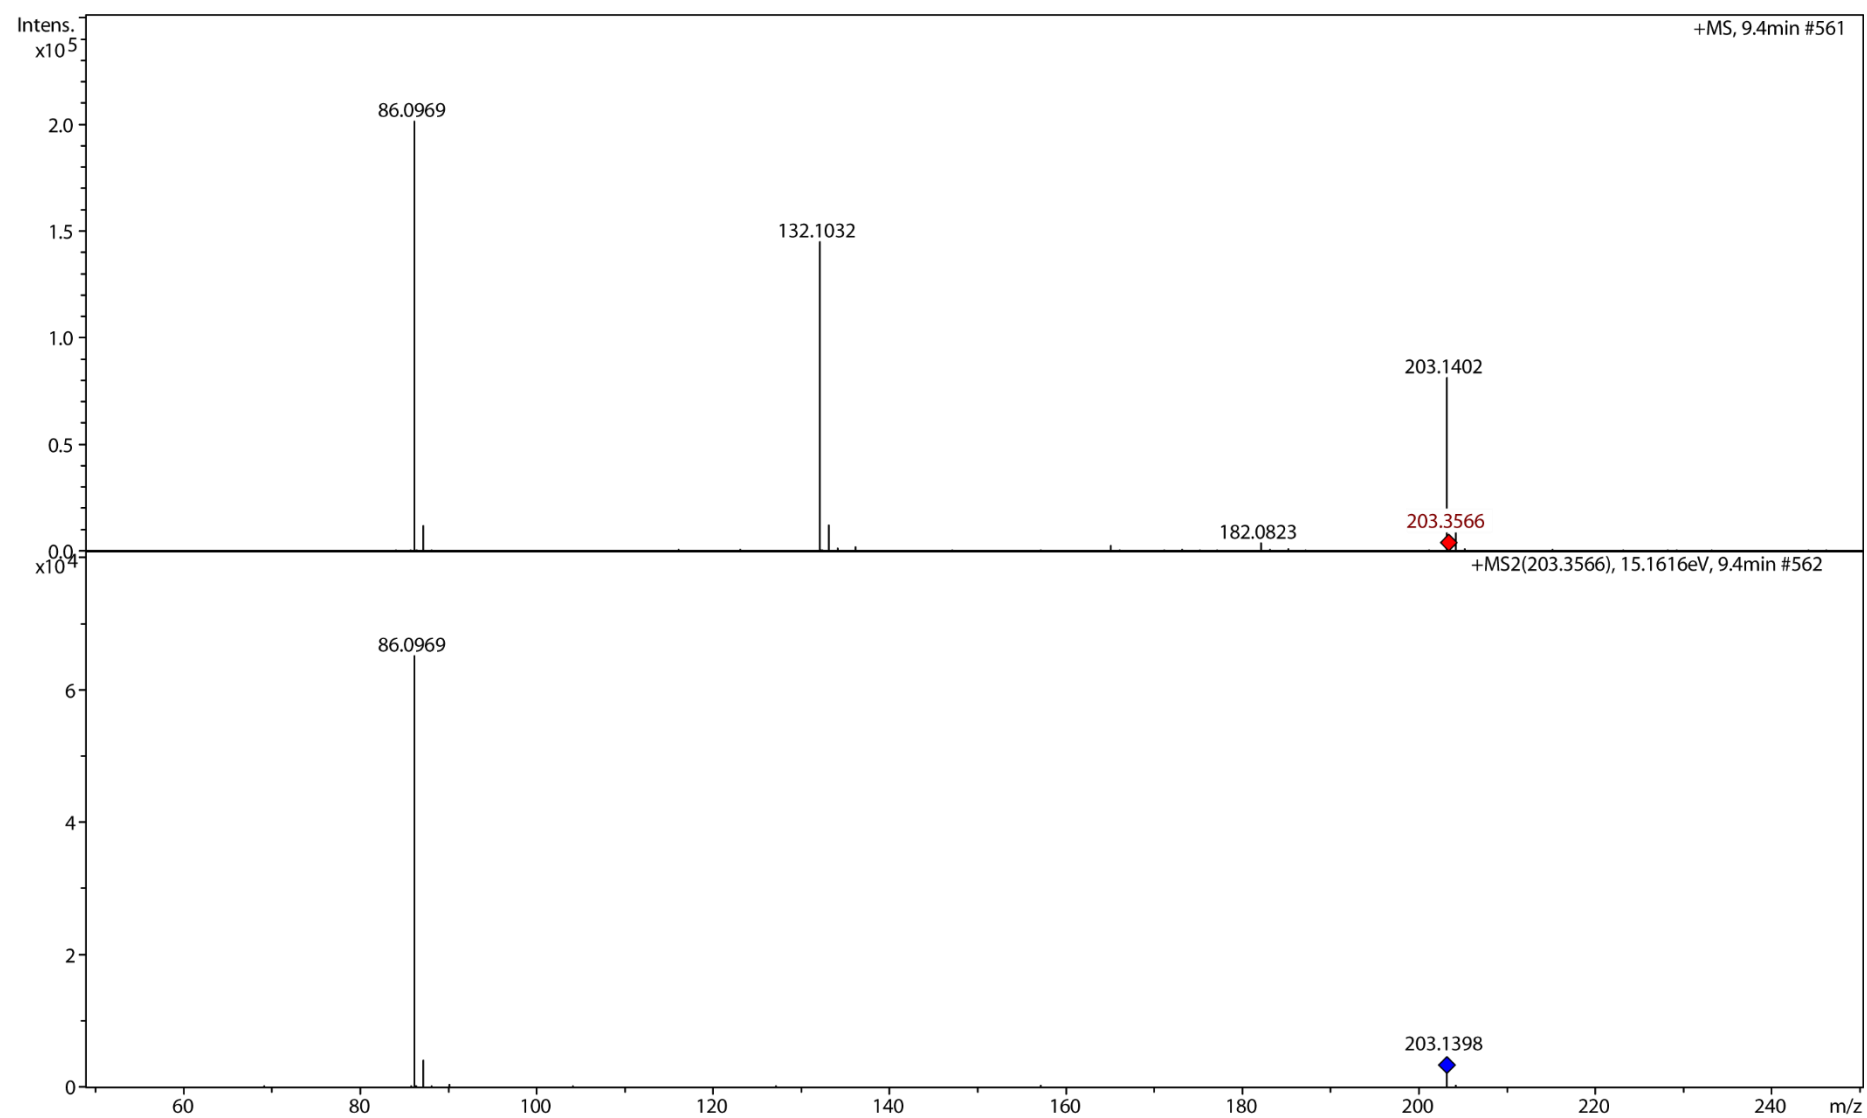



**Figure S8.** MS (top) and MS/MS (bottom) spectra of the peptide eluted as peak 7.

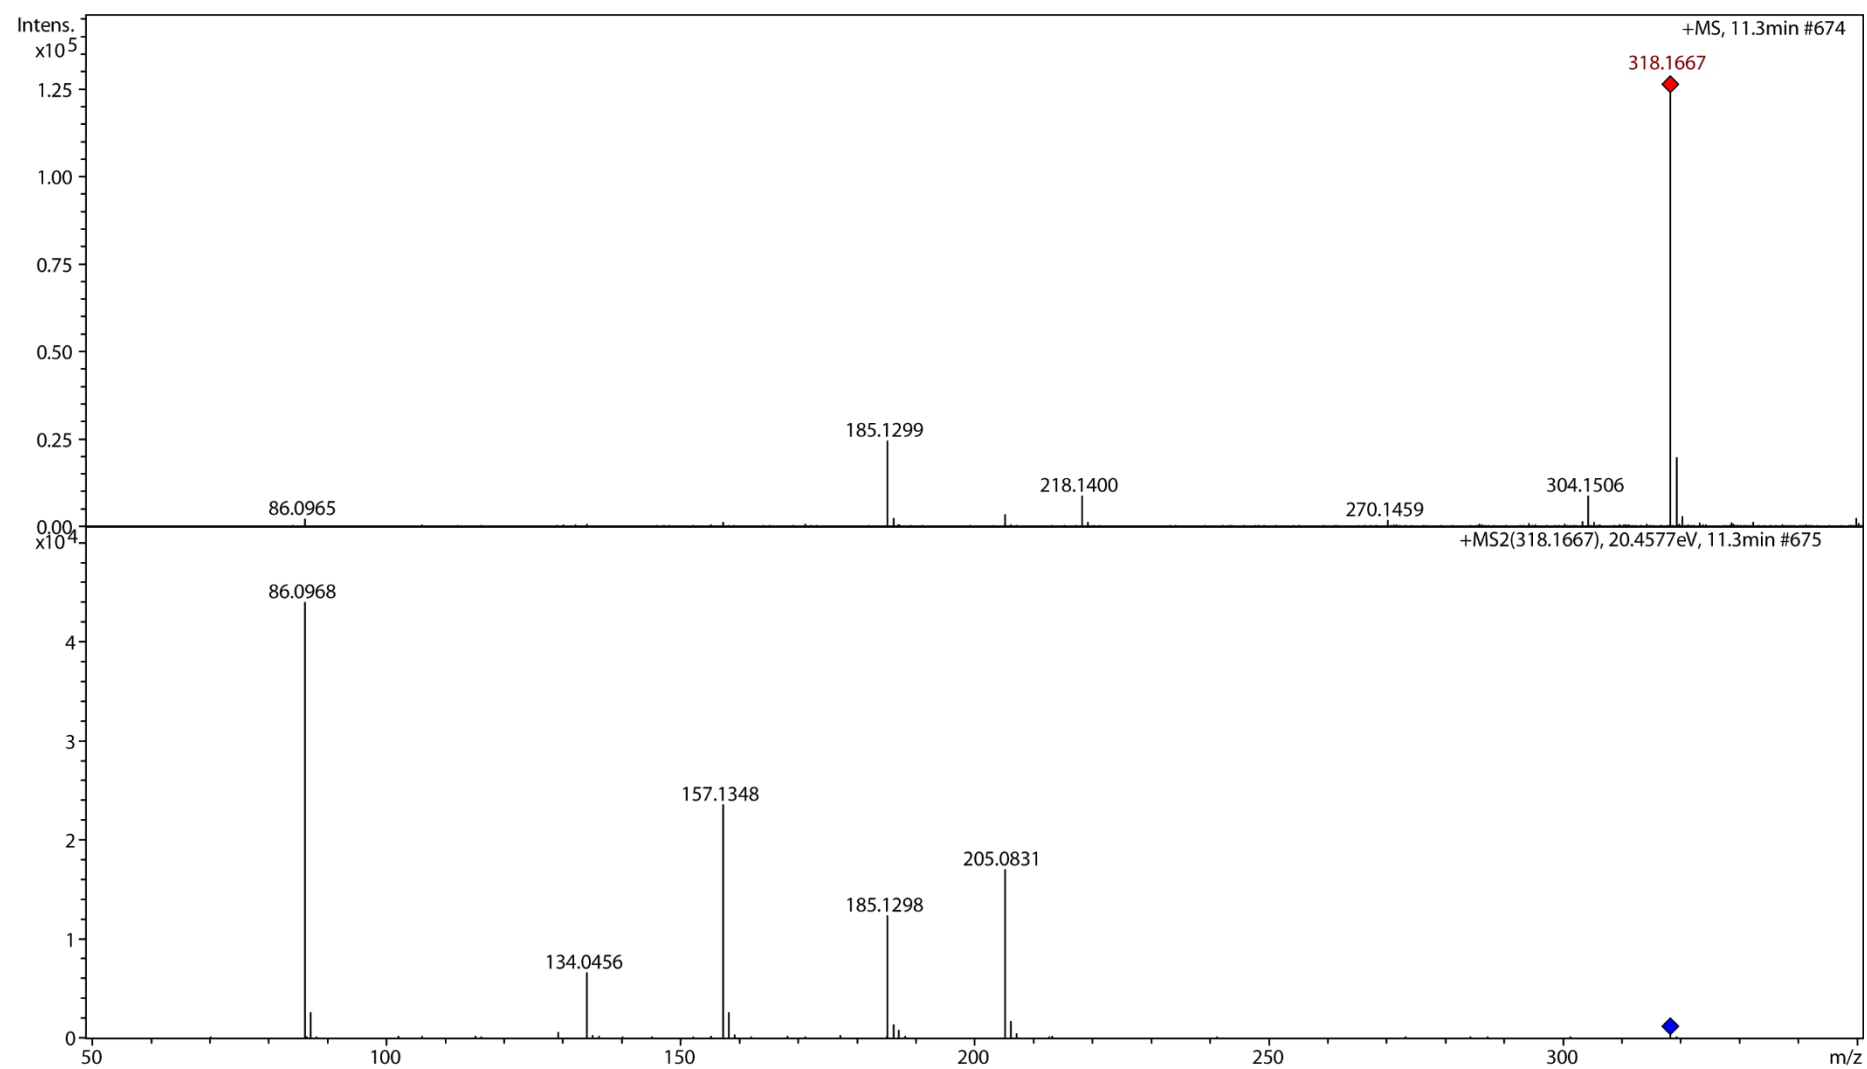

**Figure S9.** MS (top) and MS/MS (bottom) spectra of the peptide eluted as peak 8.

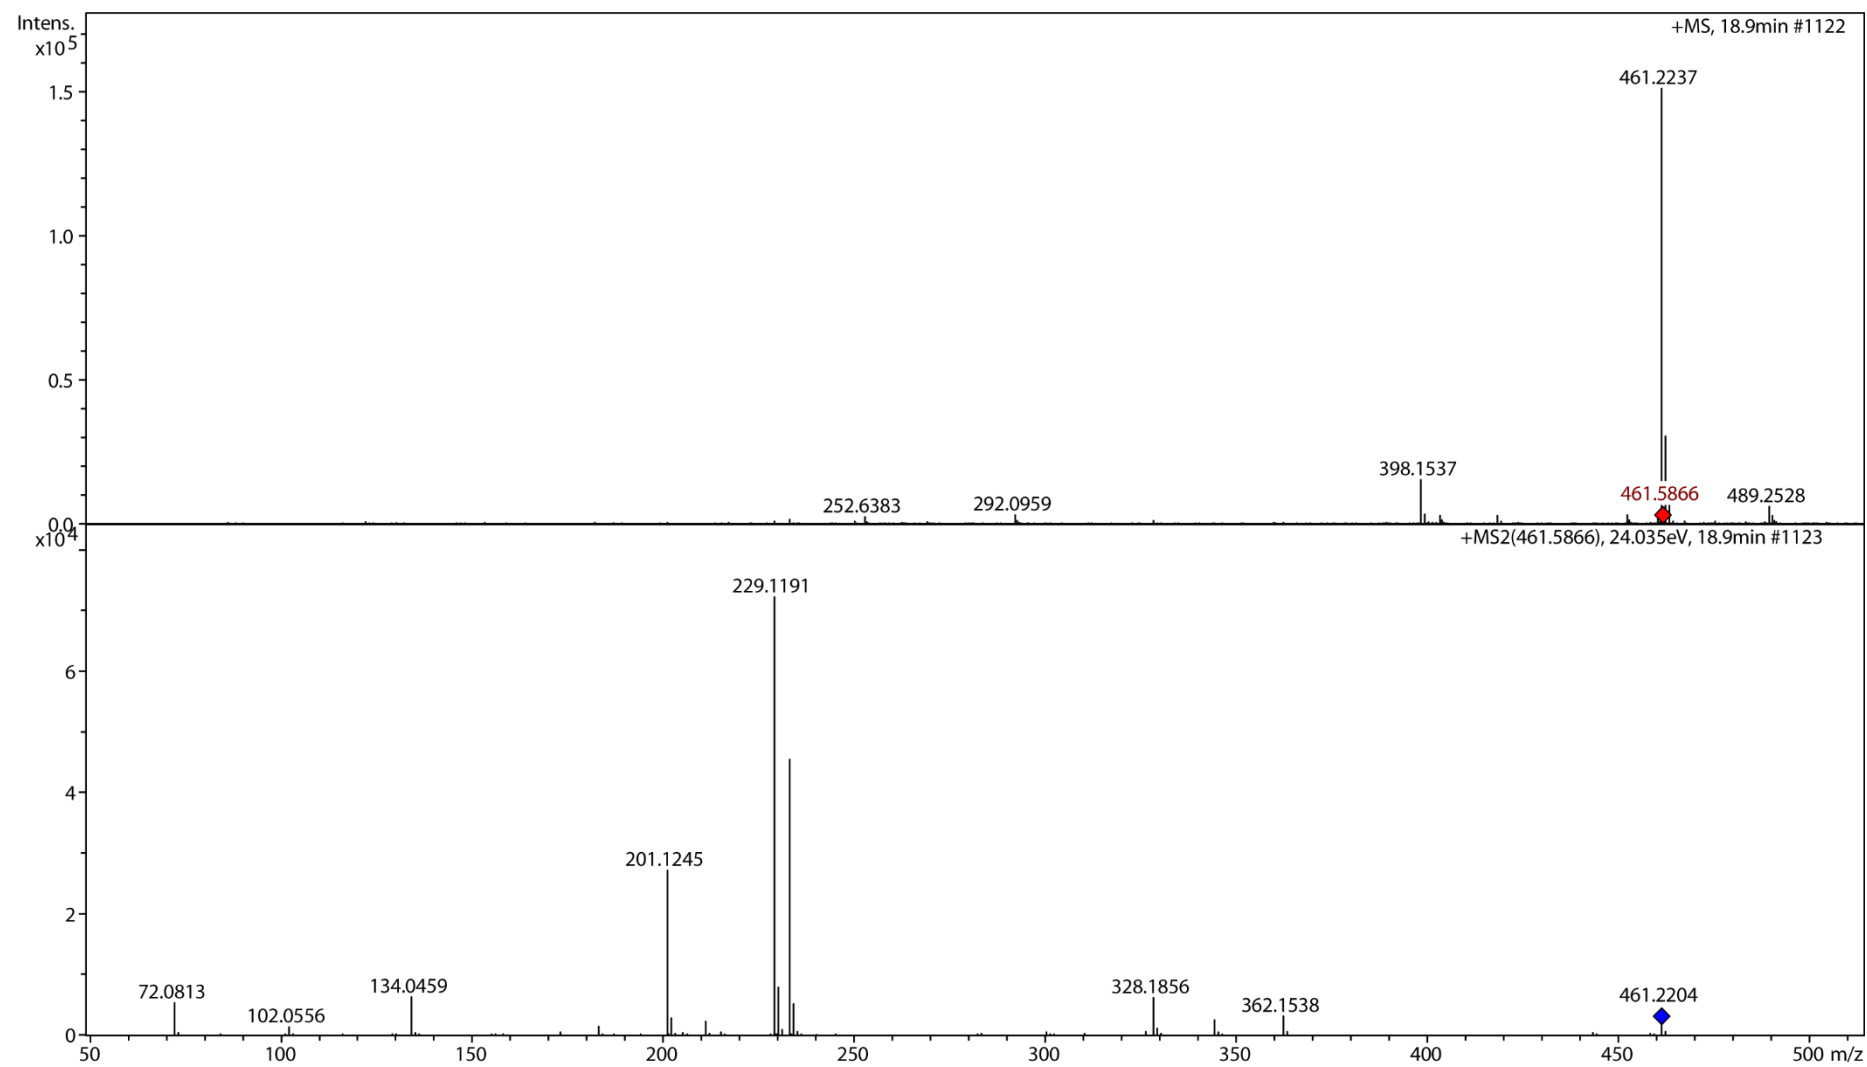

**Figure S10.** MS (top) and MS/MS (bottom) spectra of the peptide eluted as peak 9.

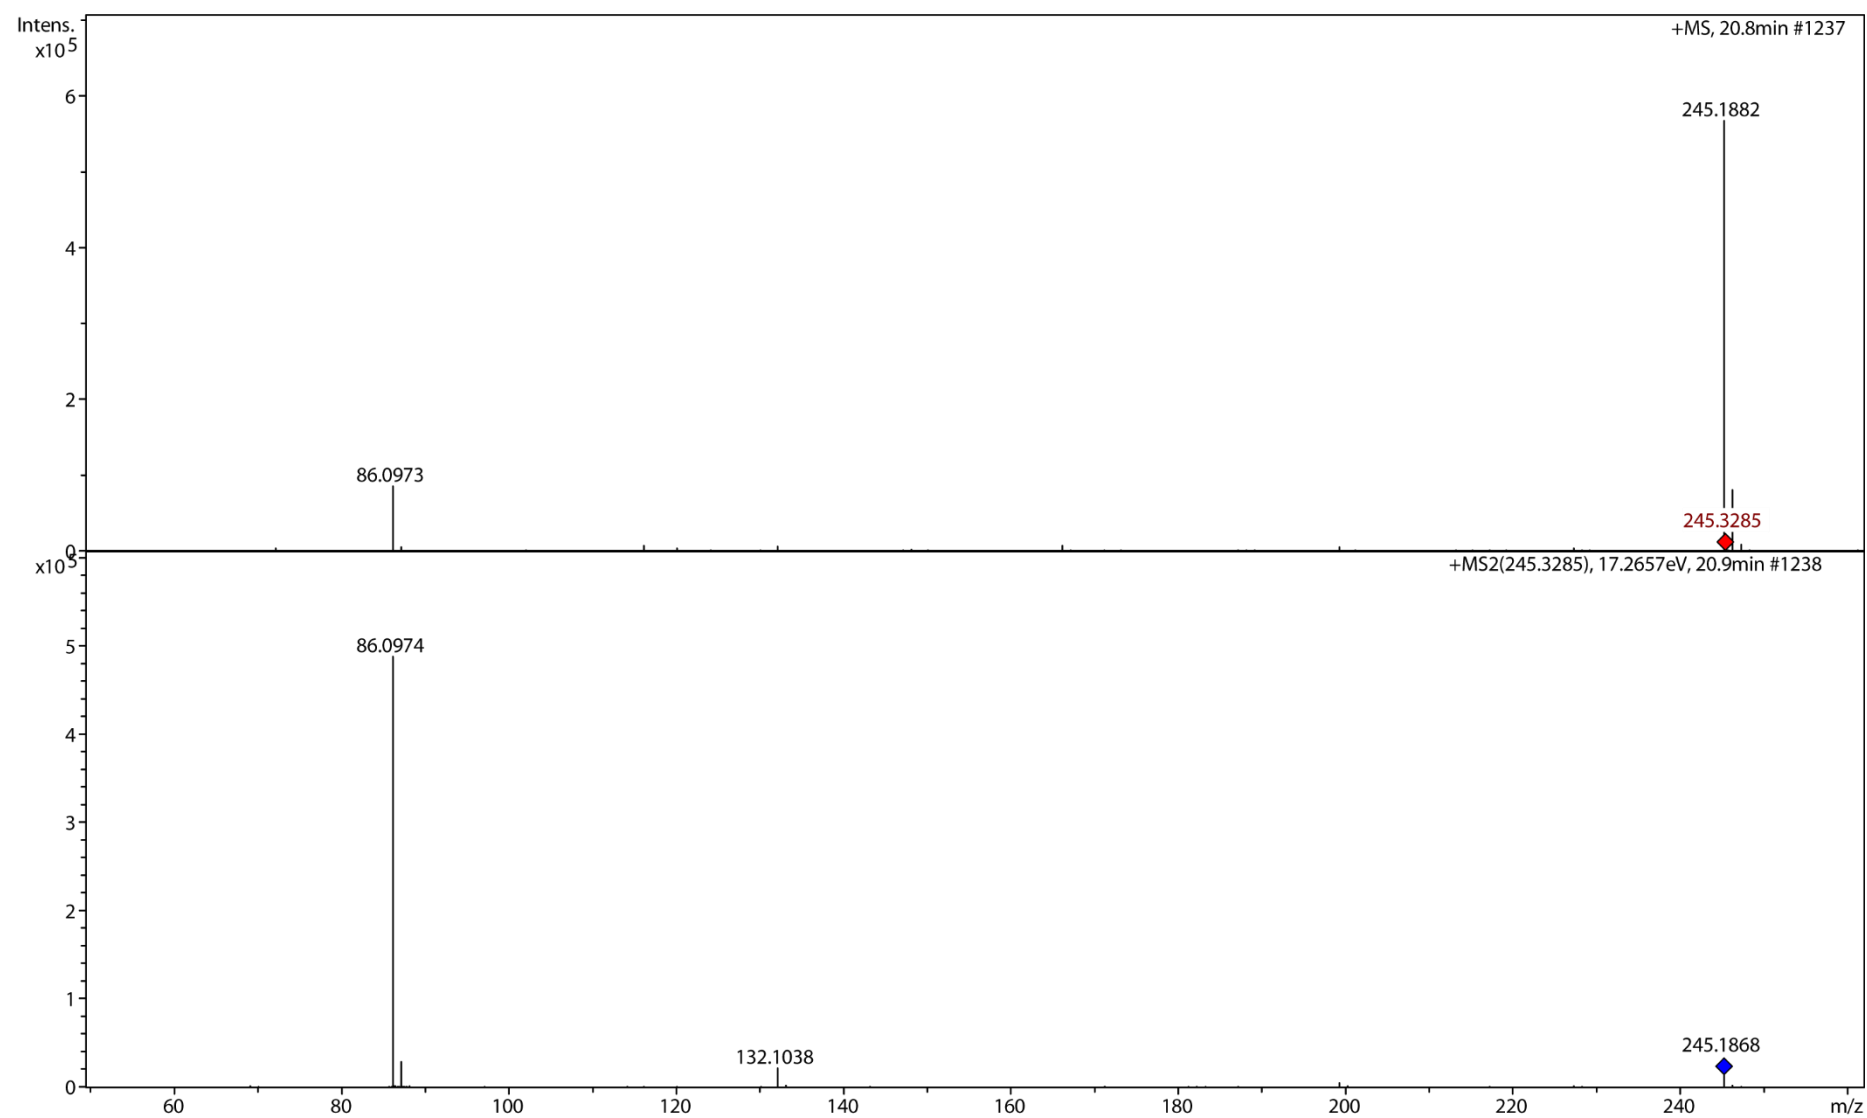

**Figure S11.** MS (top) and MS/MS (bottom) spectra of the peptide eluted as peak 10.

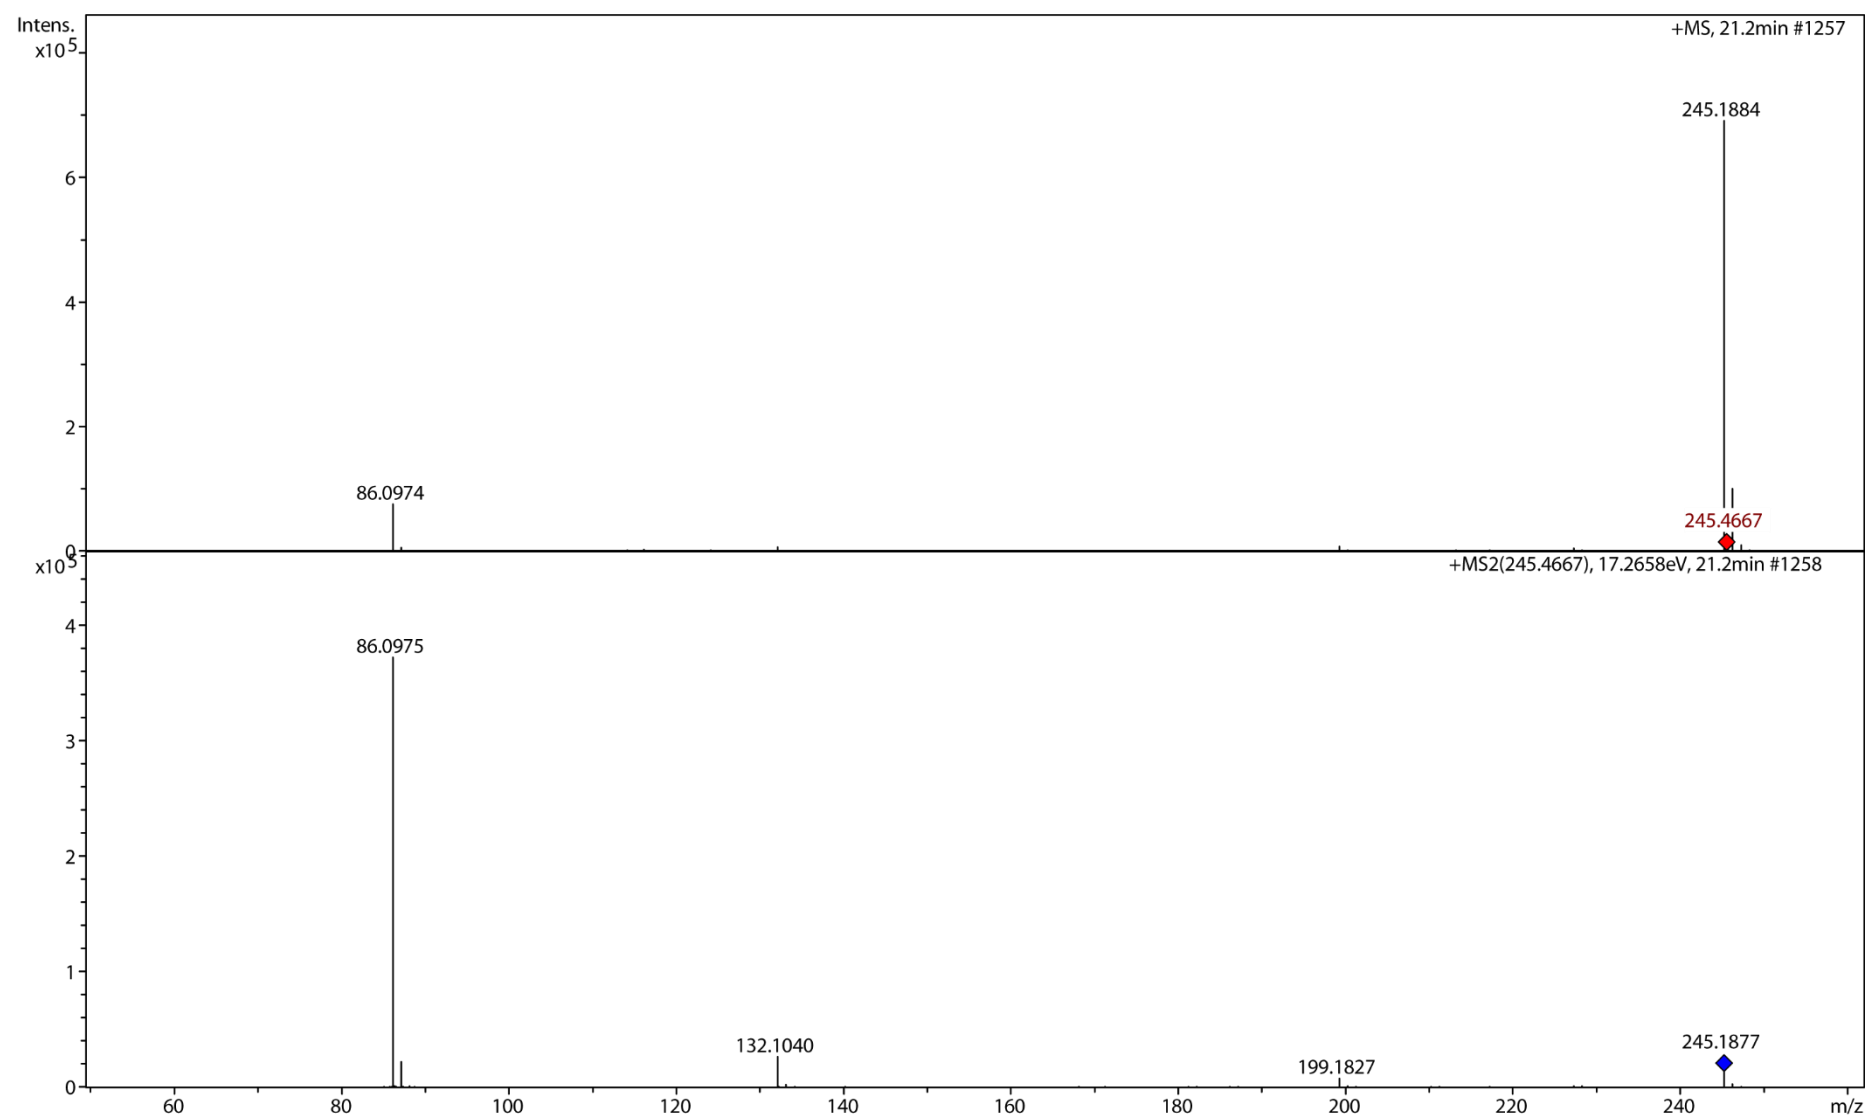

**Figure S12.** MS (top) and MS/MS (bottom) spectra of the peptide eluted as peak 11.

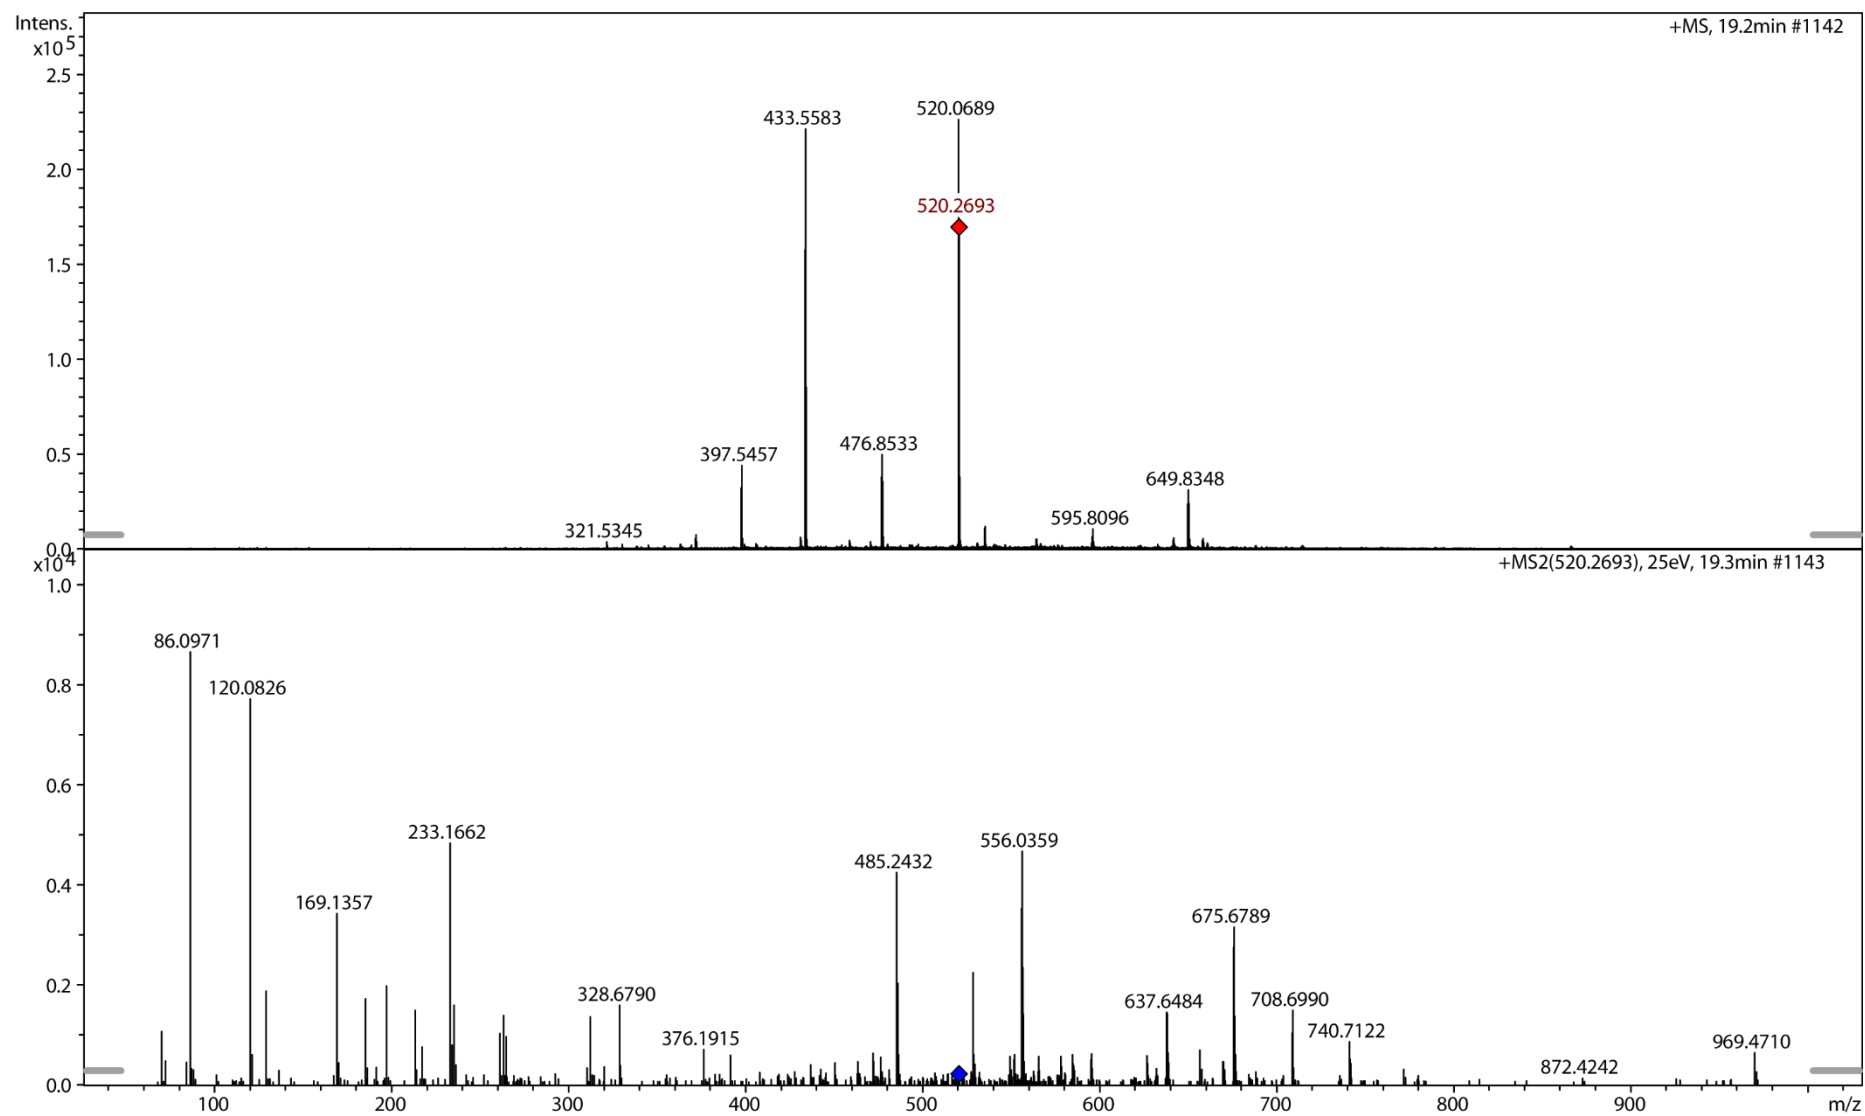

**Figure S13.** MS (top) and MS/MS (bottom) spectra of the peptide eluted as peak 12.

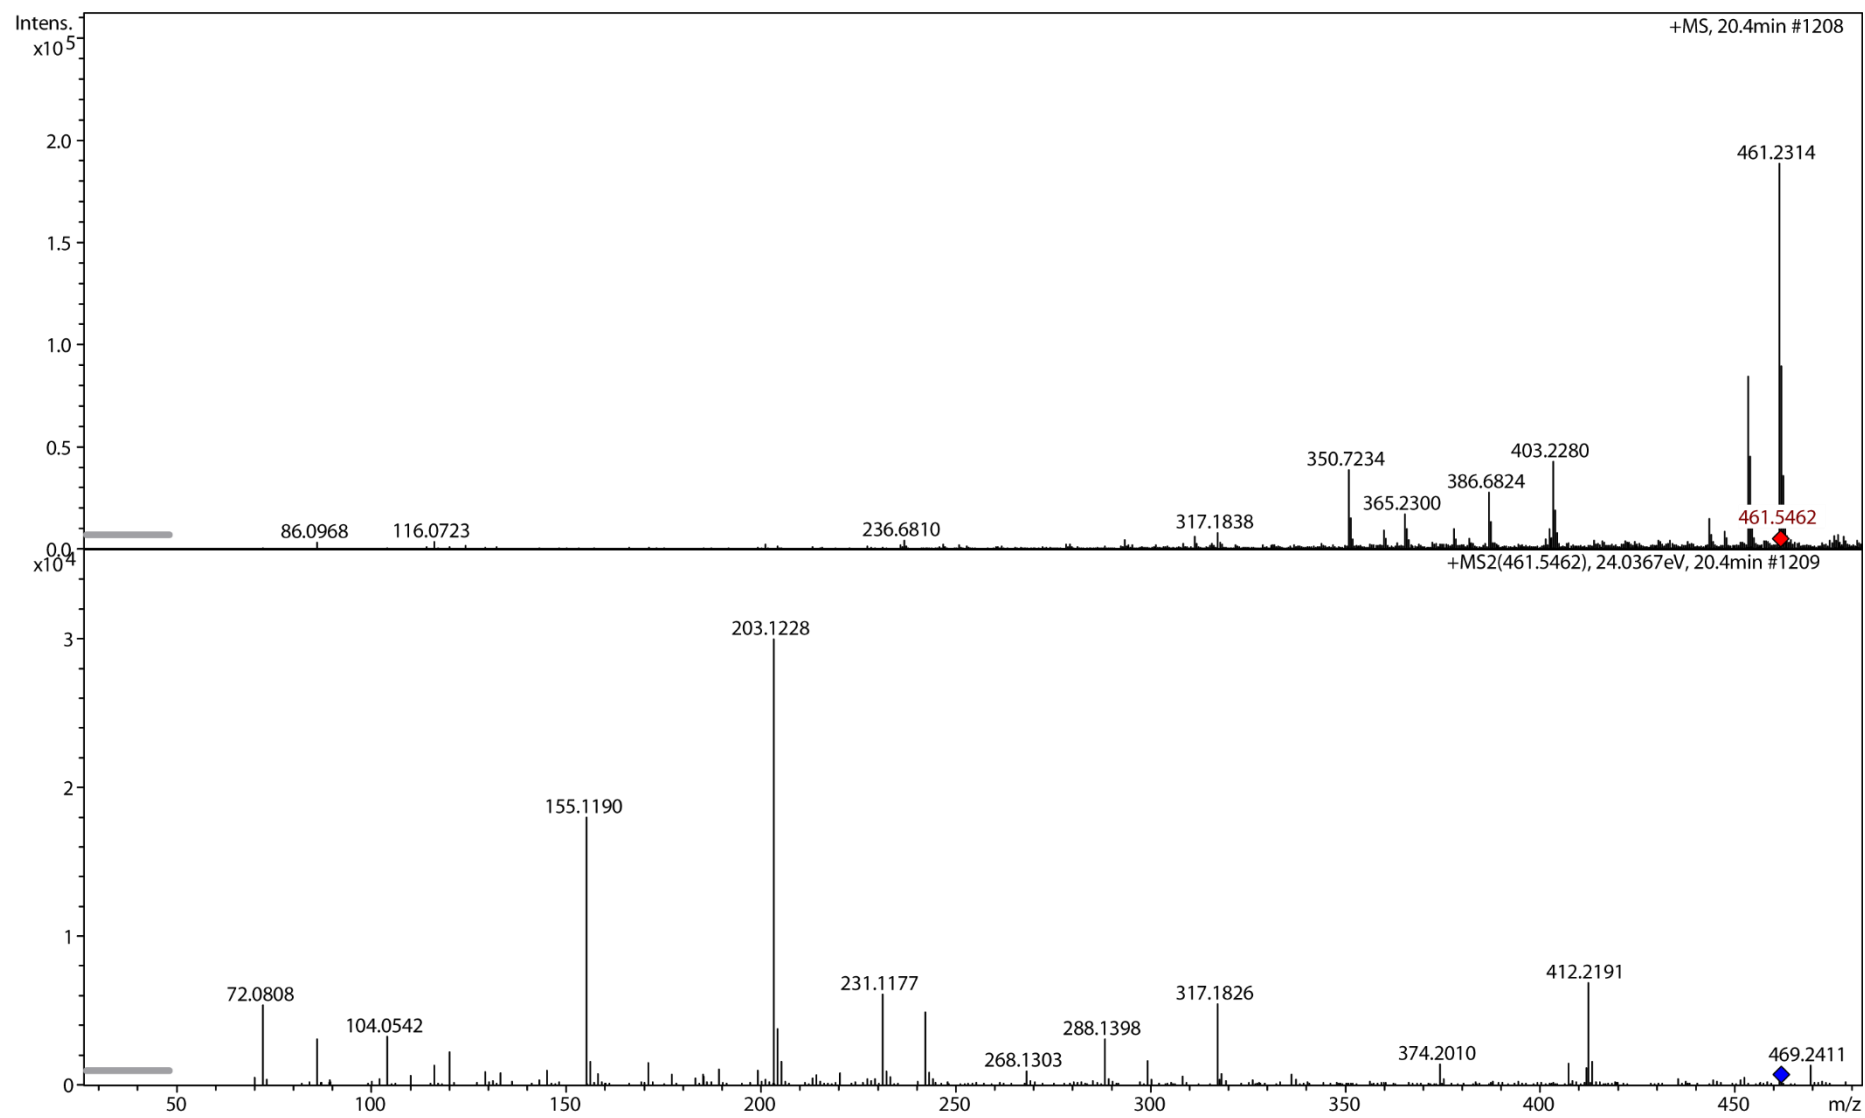

**Figure S14.** MS (top) and MS/MS (bottom) spectra of the peptide eluted as peak 13.

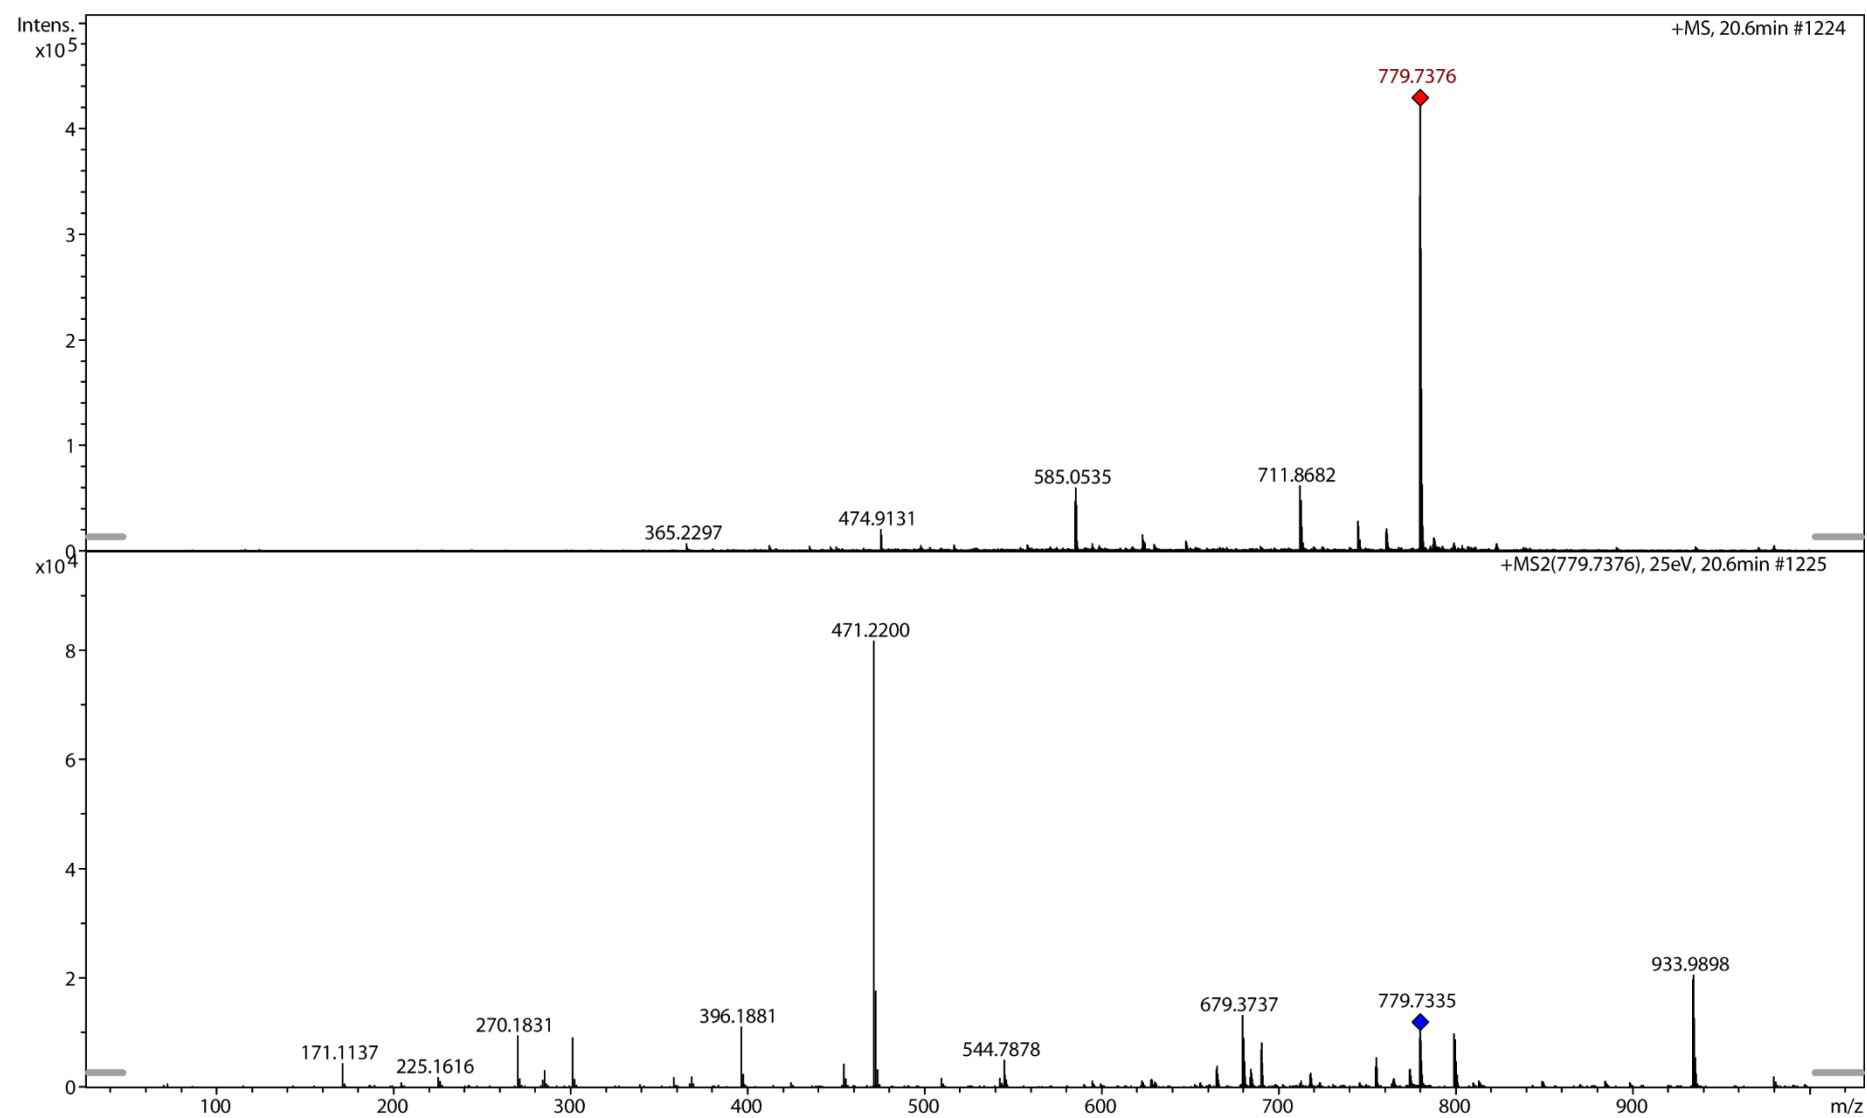

**Figure S15.** MS (top) and MS/MS (bottom) spectra of the peptide eluted as peak 14.

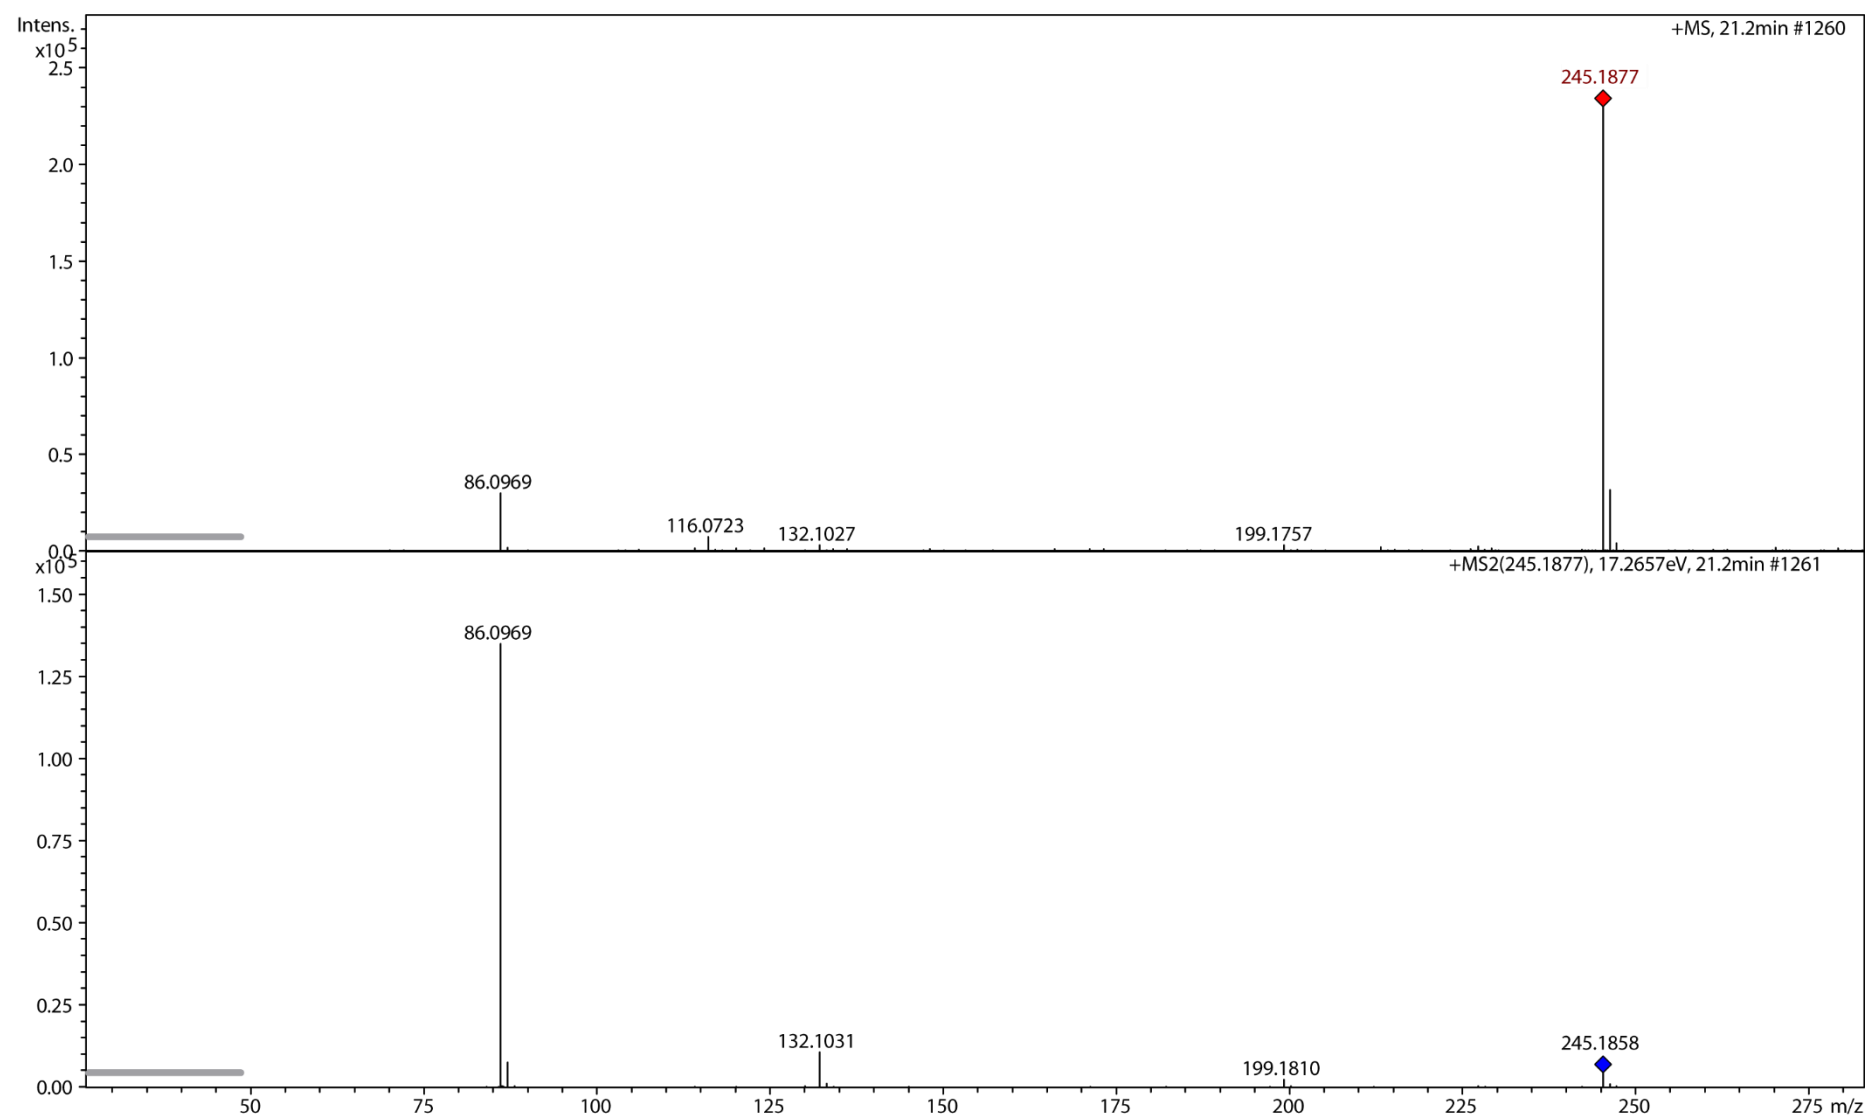



**Figure S16.** MS (top) and MS/MS (bottom) spectra of the peptide eluted as peak 15.

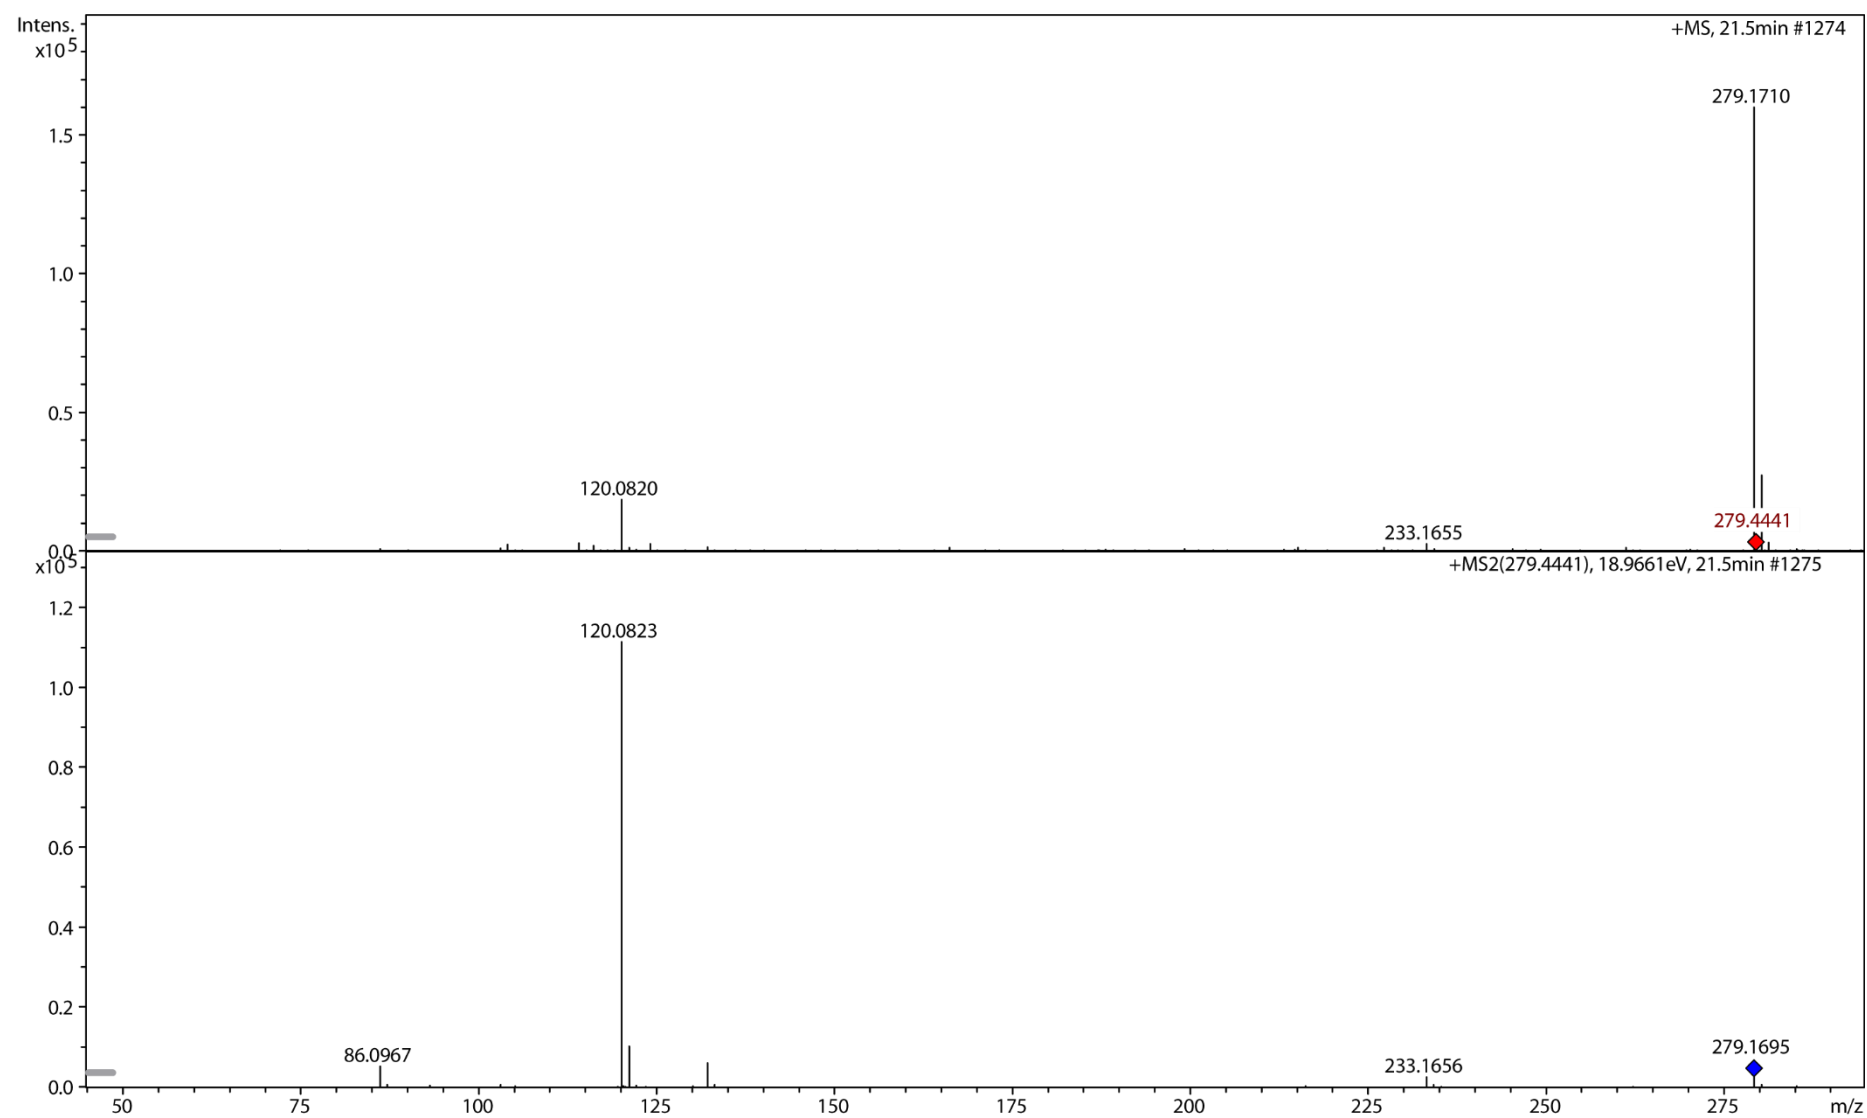

**Figure S17.** MS (top) and MS/MS (bottom) spectra of the peptide eluted as peak 16.

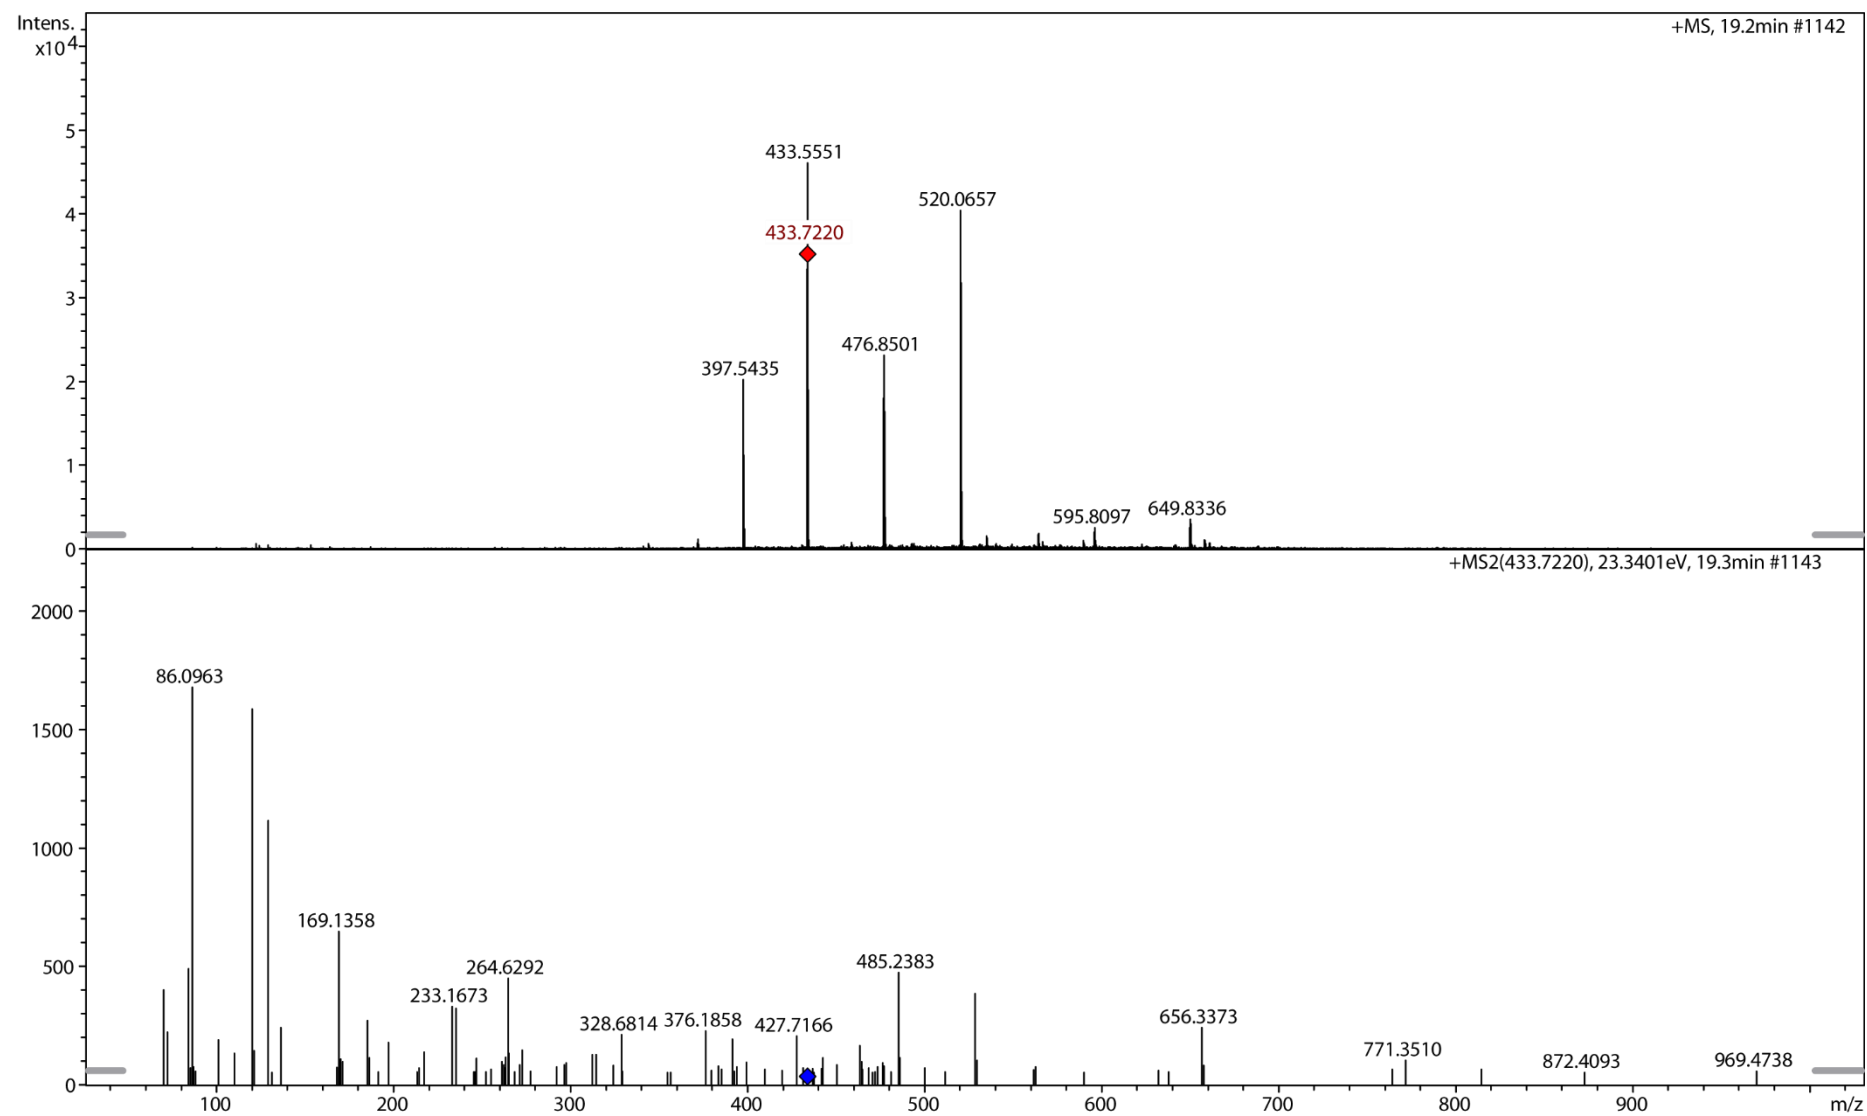

**Figure S18.** MS (top) and MS/MS (bottom) spectra of the peptide eluted as peak 17.

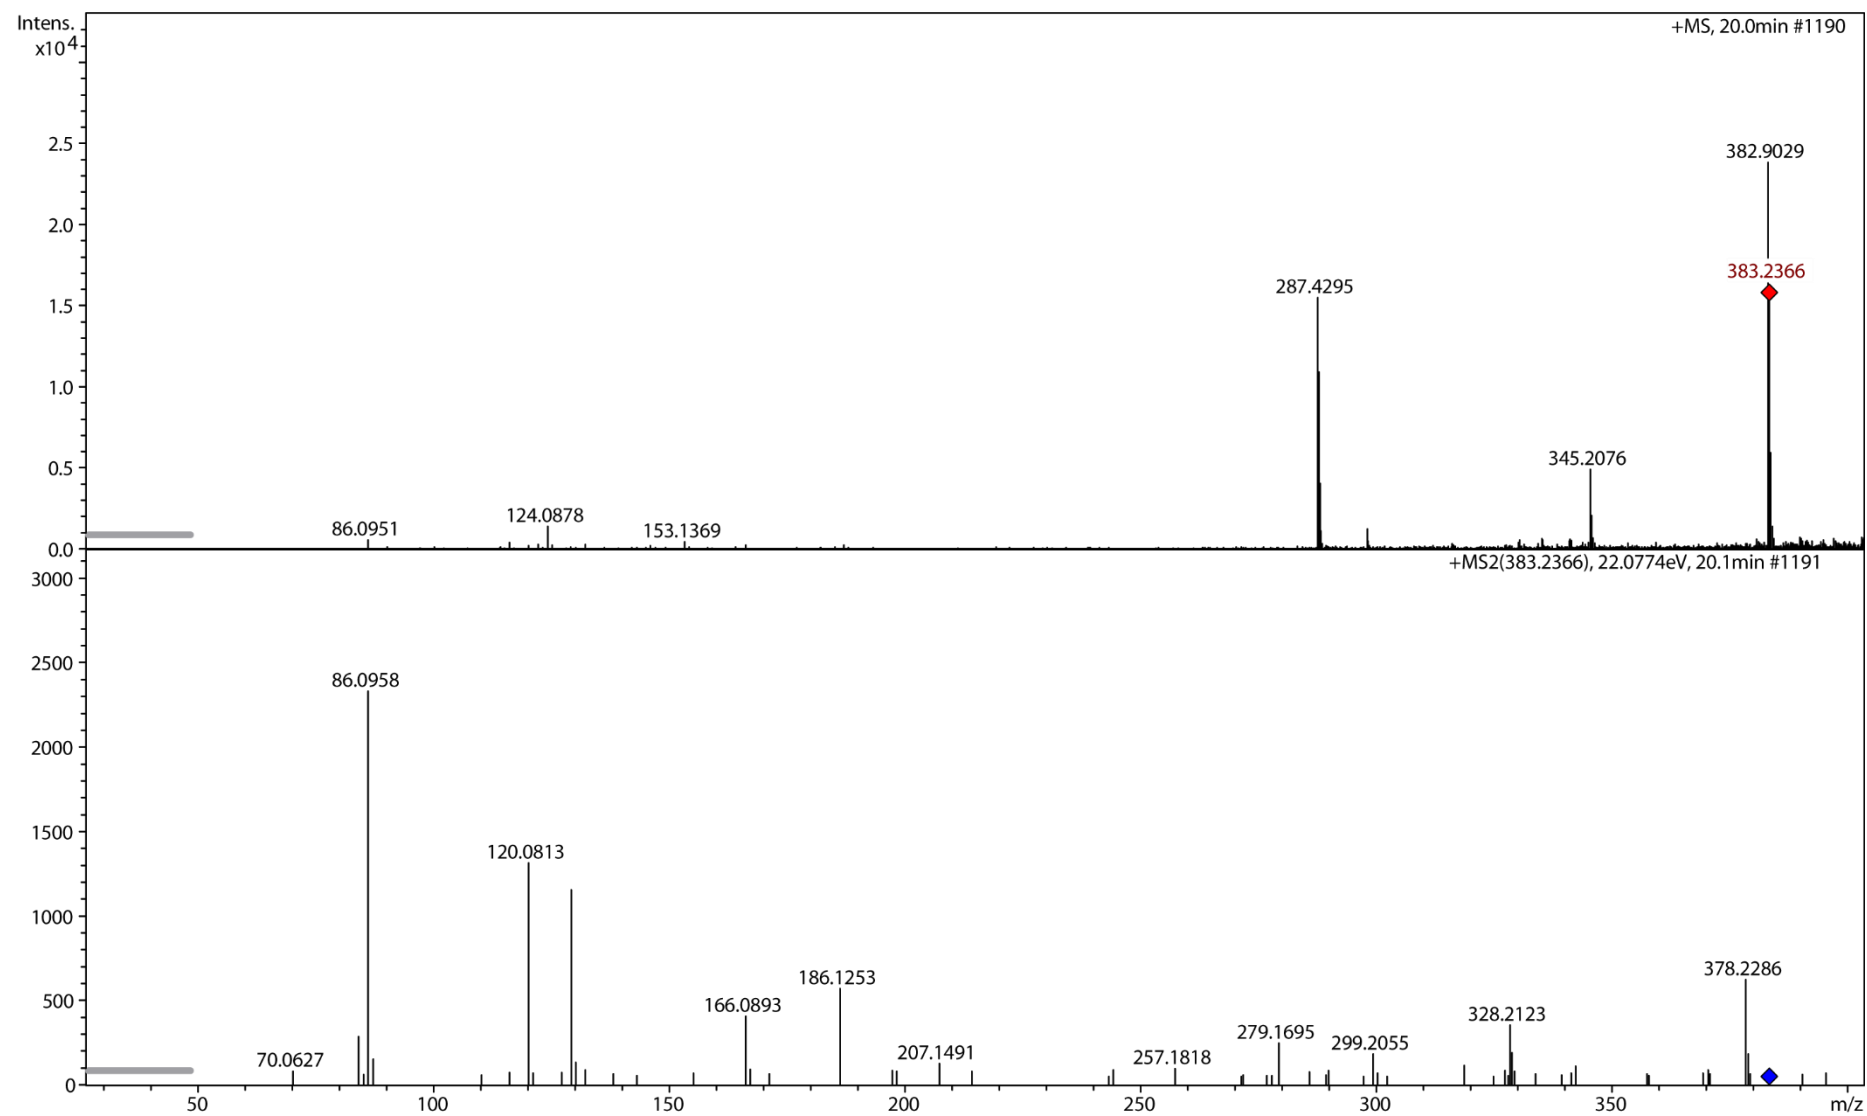

**Figure S19.** MS (top) and MS/MS (bottom) spectra of the peptide eluted as peak 18.

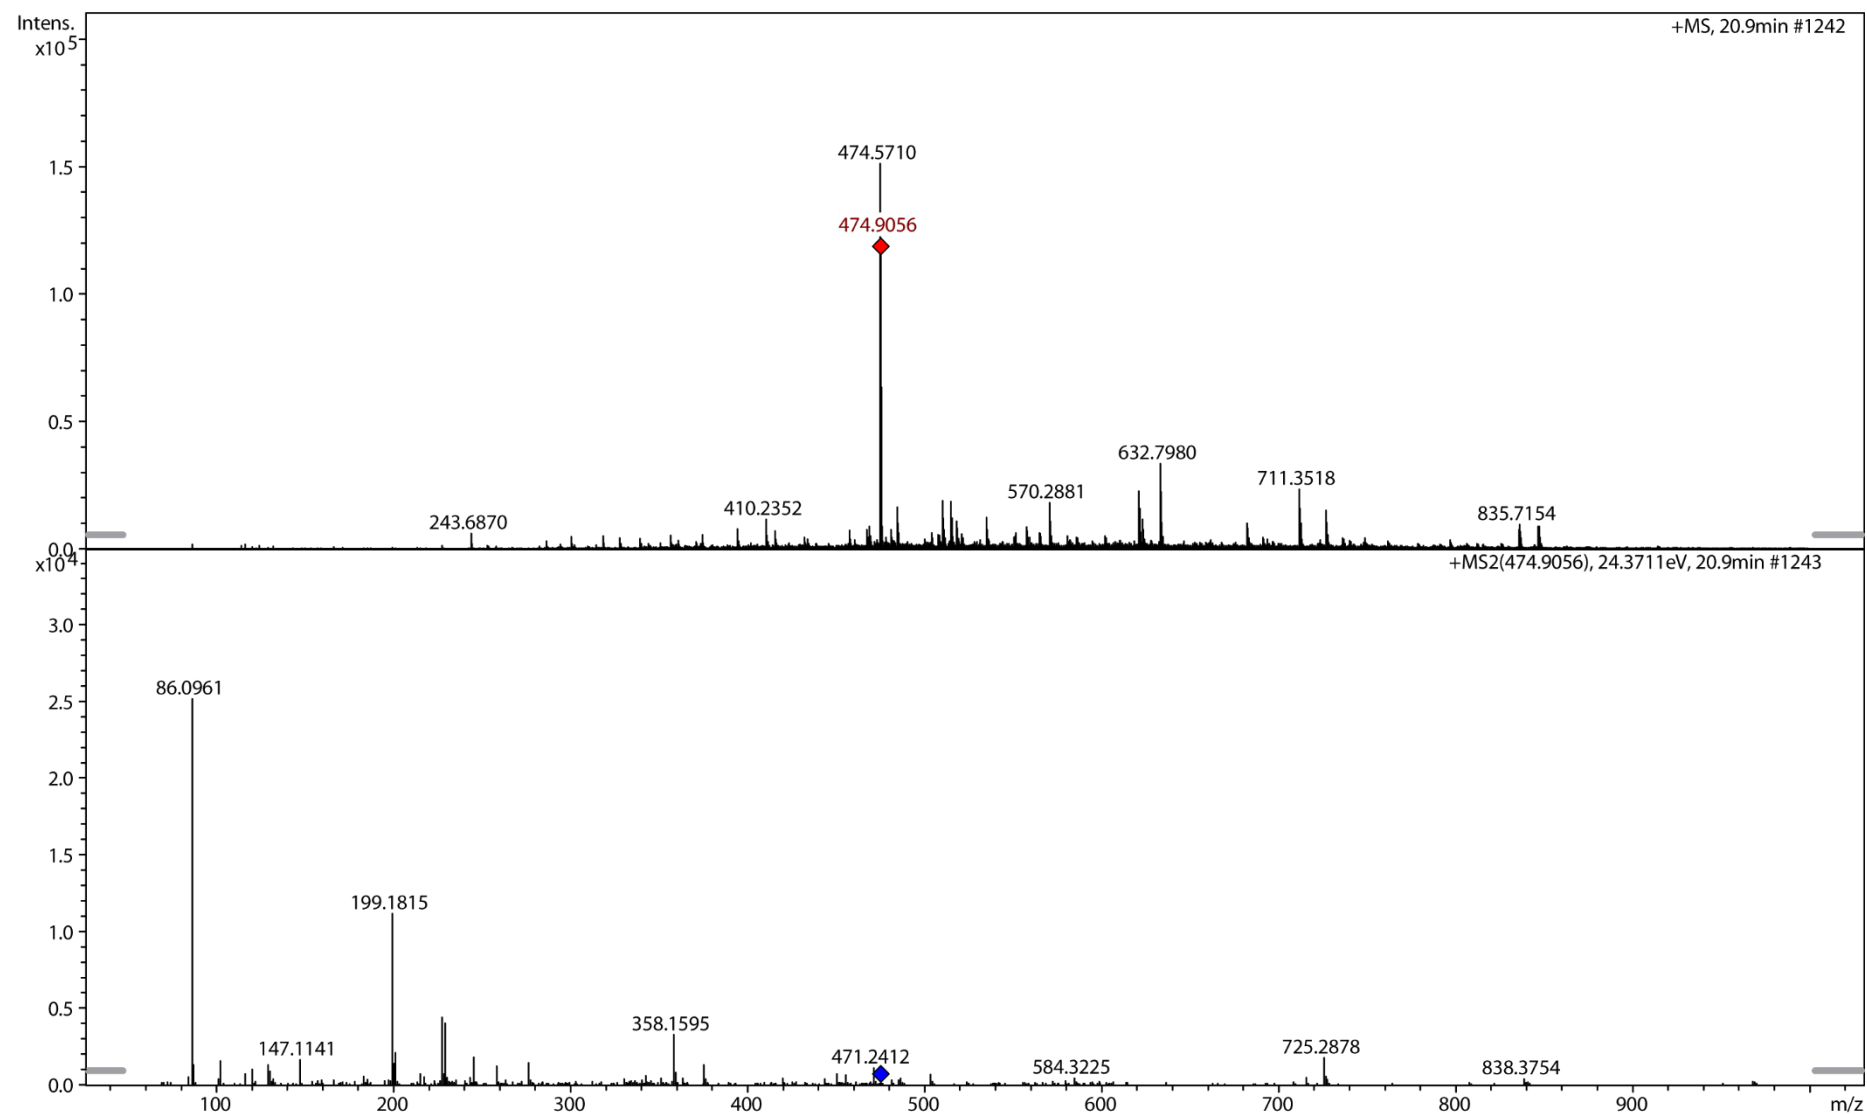

**Figure S20.** MS (top) and MS/MS (bottom) spectra of the peptide eluted as peak 19.

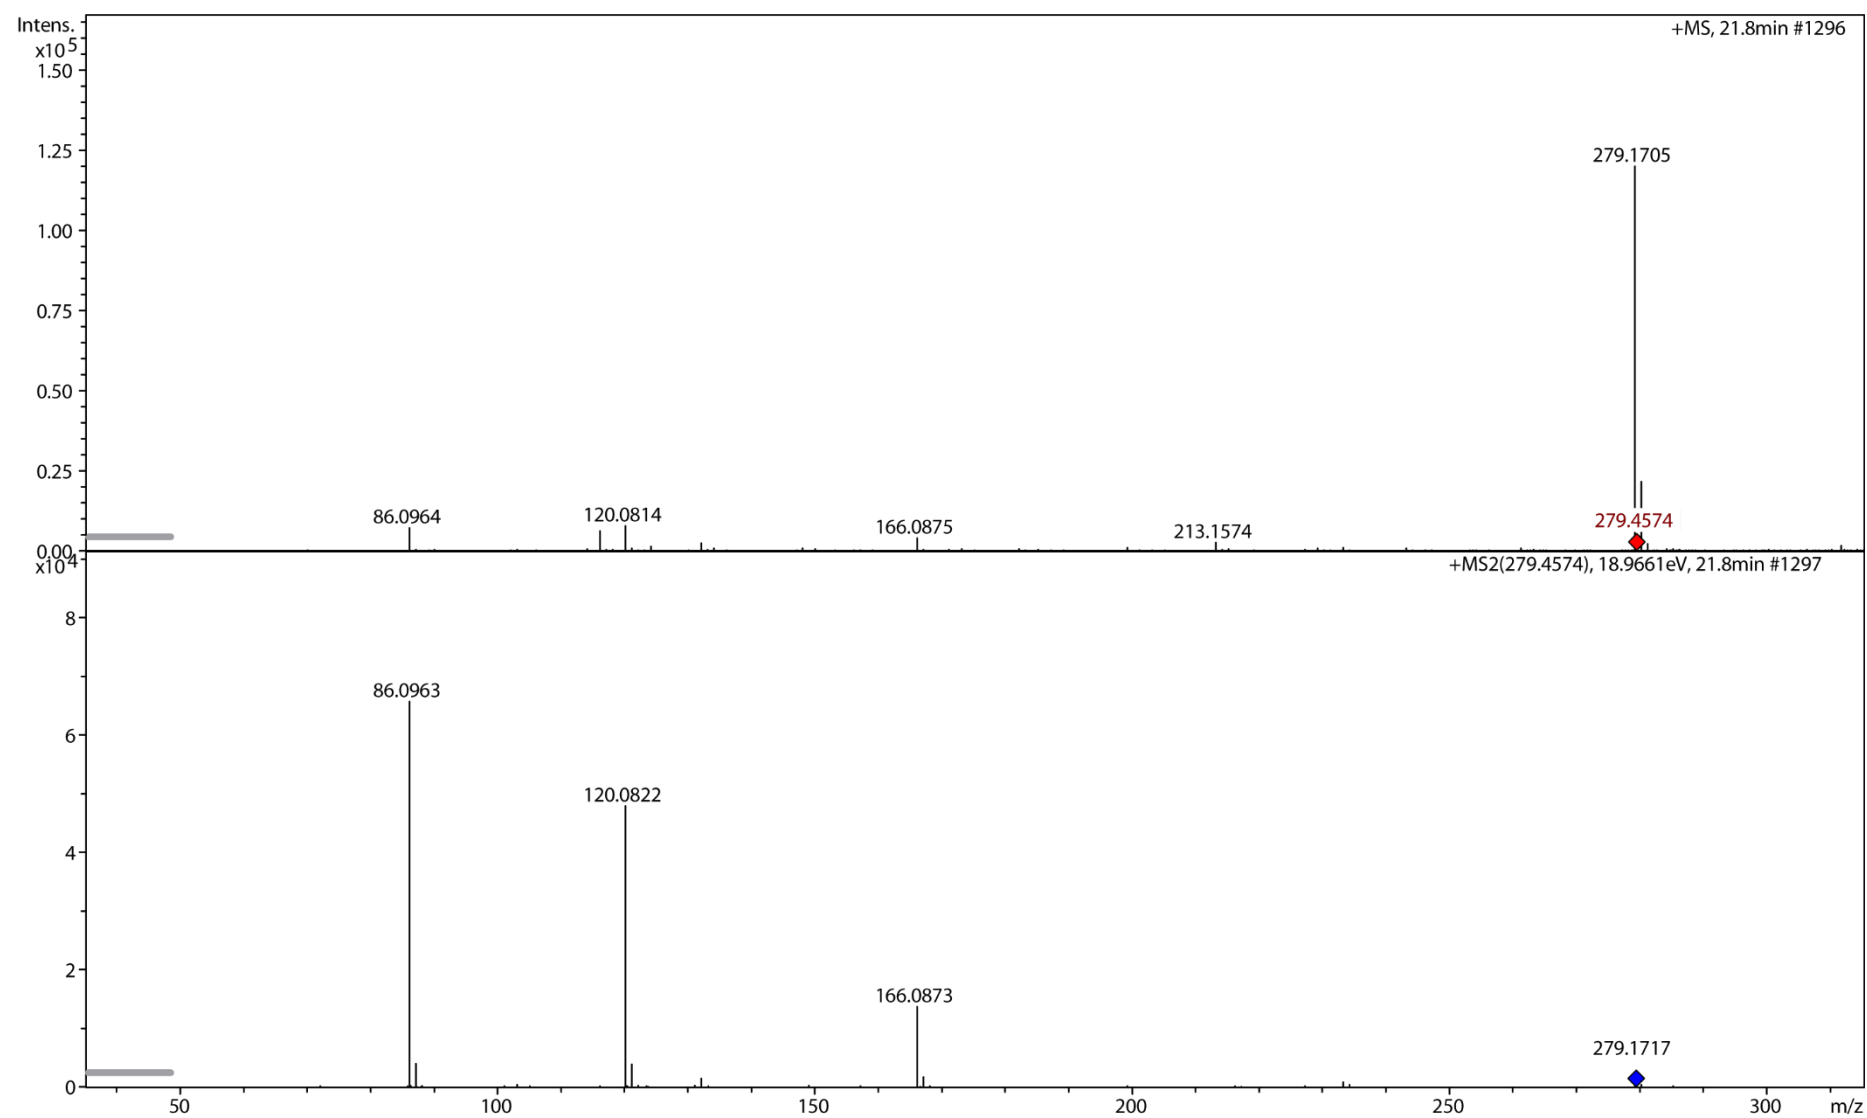

Supplement: c8fo02450b1.pdf [file c8fo02450b1.pdf]
